**Title:**

The relationship between PD-L1 and quiescence in melanocyte stem cell aging.

**Author List/Affiliations:**

Joseph W. Palmer<sup>1</sup>, Kyrene M. Villavicencio<sup>1</sup>, Misgana Idris<sup>1</sup>, Dominique Weddle<sup>1</sup>, Fabian V. Filipp<sup>2</sup>, NISC Comparative Sequencing Program<sup>3</sup>, William J. Pavan<sup>4</sup>, Melissa L. Harris<sup>1\*</sup>

**Author List Footnotes:**

<sup>1</sup>Department of Biology, University of Alabama at Birmingham, Birmingham, AL, USA

<sup>2</sup>Institute of Computational Biology, Helmholtz Zentrum München, Ingolstädter Landstr. 1, 85764 Neuherber

<sup>3</sup>NIH Intramural Sequencing Center, National Human Genome Research Institute, National Institutes of Health, Bethesda, MD, USA

<sup>4</sup>Genetic Disease Research Branch, National Human Genome Research Institute, National Institutes of Health, Bethesda, MD, USA

**Contact Info:**

\*Correspondence: [harrisml@uab.edu](mailto:harrisml@uab.edu)

## Summary:

A central aspect of life-long stem cell function in slow cycling stem cells is the proper regulation of cellular quiescence. How the quiescent state is achieved, whether all quiescent cells are equivalent, and if the quiescent stem cell pool changes with age are all questions that remain unanswered. Using quiescent melanocyte stem cells (qMcSC) as a model, we found that stem cell quiescence is neither a singular nor static process and can be heterogeneous. As one example of this heterogeneity, we show that a portion of qMcSCs expresses the immune checkpoint protein PD-L1 at the cell membrane (PD-L1<sup>mem+</sup>), PD-L1<sup>mem+</sup> qMcSCs are better retained with age, and that the aged quiescent McSC pool is transcriptomically more deeply quiescent. Collectively these findings demonstrate that PD-L1 expression is a physiological attribute of quiescence in McSCs and PD-L1<sup>mem+</sup> quiescent stem cells may be good targets for reactivation in the context of aging.

## Keywords:

aging, quiescence, PD-L1, melanocyte stem cell, hair graying

## Introduction:

Healthy aging depends on the proper and persistent function of tissue-specific stem cell populations throughout the body (Ahmed et al., 2017; Oh et al., 2014). Numerous studies have shown that a variety of genetic and environmental factors can contribute to dysfunction in stem cell maintenance and self-renewal resulting in premature tissue aging (Cheung et al., 2015; Harris et al., 2018; Inomata et al., 2009; Uno and Nishida, 2016). The dormant state of cellular quiescence ( $G_0$ ) is the primary method by which premature proliferative exhaustion of stem cell populations is prevented with age (Tümpel and Rudolph, 2019). Although often described simply as a state of reversible non-proliferation, recent discoveries suggest that regulation of  $G_0$  is remarkably diverse and dynamic (Cho et al., 2019; Coller et al., 2006; Kwon et al., 2017; Urbán and Cheung, 2021). The  $G_0$  state allows stem cells to remain poised for reactivation. Upon receipt of specific activation cues, stem cells rapidly reenter the cell cycle to produce differentiated progeny to restore and maintain tissue homeostasis (Cheung and Rando, 2013; Velthoven and Rando, 2019). In fact, several genes are upregulated during  $G_0$  and knock-down studies have shown that these cell state-specific genes are required for preventing stem cell depletion suggesting that  $G_0$  is more tightly regulated than previously thought (Du et al., 2012; Mourikis et al., 2012; Zhou et al., 2018). Yet, few studies have focused on evaluating whether stem cells during  $G_0$  are molecularly equivalent and whether all  $G_0$  stem cells undergo age-related changes. We anticipate that the composition of the  $G_0$  stem cell pool changes with age and that these changes predict the regenerative capacity of that tissue in the context of aging.

Uncovering the extent and complexity of  $G_0$  within mammalian stem cell populations and determining whether age-associated changes in these molecular programs occur *in vivo* remains challenging. However, melanocyte stem cells (McSCs) residing within the hair follicle stem cell niche provide an ideal model to address this problem. McSCs are responsible for providing the differentiated, pigment-producing melanocytes that reside in the hair follicle bulge. These melanocytes deposit melanin into the growing hair follicle, which results in the coloration of our hair (Slominski et al., 1994, 2005). Gray hair is one of the most readily recognized, and outwardly visible, age-associated phenotypes and has been largely attributed to the gradual depletion of McSCs with age (Inomata et al., 2009; Nishimura et al., 2005). McSC activation and  $G_0$  are easily evaluated because these processes are inextricably tied to distinct stages of the hair cycle. The hair cycle consists of three main stages, growth (anagen), regression (catagen), and dormancy (telogen) and the timing of each of these stages is well-characterized in mice (Müller-Röver et al., 2001).

A highly enriched population of quiescent McSCs (qMcSCs) can be isolated from the telogen stage of the hair cycle using melanocyte-specific cell surface markers based on the fact that telogen hairs are devoid of differentiated melanocytes (Harris et al., 2018). This advantageous feature, inherent to the biology of McSCs, allowed us to uncover an underlying network of genes specifically upregulated during  $G_0$  and identify major biological processes associated with qMcSCs. Notably, we discovered that qMcSCs are enriched in genes associated with immune system processes including upregulation of the immune checkpoint protein, programmed death-ligand 1 (*Pd-L1*). Interestingly, expression of PD-L1 at the cell membrane (PD-L1<sup>mem+</sup>) marks only a subpopulation of qMcSCs *in vivo*, which reveals heterogeneity in the qMcSC pool. We also find that PD-L1<sup>mem+</sup> is tied to the  $G_0$  state of non-tumorigenic melanocytic cells *in vitro* and that PD-L1<sup>mem+</sup> expression increases as a function of  $G_0$  length. Lastly, we show that with age, the transcriptome of McSCs resembles that of a deeper  $G_0$  state and this is concurrent with changes in the aged McSC pool where PD-L1<sup>mem-</sup> qMcSCs are depleted while PD-L1<sup>mem+</sup> qMcSCs are retained. The results of this study highlight the molecular changes that occur during  $G_0$  in young and aged  $G_0$  stem cells, links

PD-L1<sup>mem+</sup> expression to the G<sub>0</sub> state, and points to increased G<sub>0</sub> depth as a novel paradigm for stem cell aging.

## Results:

### Defining an *in vivo* transcriptome regulating stemness and quiescence in McSCs.

To evaluate the effects of aging on McSC G<sub>0</sub> we first established an *in vivo* gene expression profile that distinguishes adult qMcSCs from their non- G<sub>0</sub> McSC precursors or melanoblasts. Using tissue dissociation and flow cytometry, KIT+/CD45- melanocytic cells were isolated from the dermis of mice at two time points that are distinct developmentally and in their cell state (stem cell precursors versus stem cells, and actively proliferating versus G<sub>0</sub>) (**Figure 1a**). Cells were harvested at P0.5 to encompass proliferating melanoblasts colonizing the hair follicle and at 8 weeks to capture adult qMcSCs that reside in dormant telogen-stage hairs using methods similar to those described previously (Harris et al., 2018). These enriched cells were processed for RNA sequencing (RNA-seq) and differential gene expression analysis. Downstream analysis showed that 8705 genes were differentially expressed between these two cell populations (q-value < 0.05, absolute log2 fold-change (L2FC) > 0.5; **Supplemental File 1**). We interpret these differentially expressed genes (DEGs) to reflect the global shift in gene expression required for actively proliferating melanoblasts to successfully colonize the hair follicle stem cell niche and transition to the adult, G<sub>0</sub> and stem cell state. As expected for qMcSCs, our RNA-seq data showed decreased expression in several cell cycle related genes (*Ki67*, *Cdk2*, and *Cdk4*) and melanogenesis-related genes (*Dct*, *Mitf*, *Pmel*, *Tyr*, and *Sox10*). Conversely, we found increased expression of known stemness genes including *Epas1*, *Hes1*, *Klf4*, *Klf10*, and *Sox9*, along with several genes associated with the regulation of G<sub>0</sub> in other stem cell populations including, *Cdkn1a*, *Nfatc1*, *Col12a1*, and *Arid5a* (**Figure 1b**). To identify relevant molecular pathways that contribute to maintaining (i) the G<sub>0</sub> state and/or (ii) the undifferentiated stemness properties of McSCs, we selected the outer 10% of DEGs upregulated in either melanoblasts or qMcSCs for further evaluation. This top 10% was based on the highest-ranked expression of the normalized mean of counts across all samples. This resulted in a short-list of what we refer to as the “core DEGs”. We used these core-DEGs to represent the proliferative (516, ‘Melanoblast Core’) and G<sub>0</sub>/stem (357, ‘Adult qMcSC Core’) transcriptomic signatures (**Figure 1c**; **Supplemental File 2**). The L2FC distribution showed that these highly expressed genes tend to have a lower overall L2FC and are often arbitrarily filtered out when using a standard 2-fold cut-off (**Figure 1c**). Yet, due to the highly expressed nature of these genes in relation to the total size of the transcriptome, this subset of core-DEGs has a high potential for biological significance. Further assessment of the core-DEGs respective to each cellular state showed well-known proliferation markers such as *Ki67* and *Top2a* to be upregulated by proliferating melanoblasts, and increased expression of protein homeostasis (*Hspa1a*, *Hspa1b*) and adhesion genes (*Cadm2*, *Cdh2*, *L1cam*,) in qMcSCs. To determine the biological processes associated with the transition of proliferating melanoblasts into qMcSCs, we evaluated the top 20 enriched biological processes using gene set enrichment analysis (GSEA). The results showed an overrepresentation of biological processes such as RNA processing and translation initiation to be associated with the proliferating melanoblasts, while regulation of cell proliferation, differentiation, and cell death were associated with qMcSCs (**Figure 1d**; **Supplemental File 2**). Altogether these results suggest that G<sub>0</sub> in McSCs is not idle and is instead actively maintained by various genes involved in several biological processes that underlie this dormant state. Upregulation of G<sub>0</sub>-specific genes and pathways further demonstrate that G<sub>0</sub> in qMcSCs is not simply reflective of the downregulation of all major cellular processes.

## Elevated *Pd-I1* expression is associated with qMcSCs.

To identify novel mediators of  $G_0$  in qMcSCs we first identified hub genes with elevated expression based on cellular state. Similar to the role of transcription factors, hub genes are defined as having an above-average number of interaction partners within the genome and simultaneously influence the expression patterns of these interacting genes (Fox et al., 2011; Liu et al., 2019). Thus, hub genes with elevated expression are likely to play a role in regulating major biological processes regulating cell state. Identification of hub genes within the core DEGs for the two time points was performed using the Enrichr database. Core DEGs were overlapped with previously defined hub genes within the mammalian genome, with hub genes defined as those genes found to have greater than 120 protein-protein interactions (PPIs) (Chen et al., 2013a; Kuleshov et al., 2016). We found a total of 39 and 9 of these hub genes to be associated with the proliferative (P0.5 melanoblasts) and  $G_0$  (8-week qMcSCs) cellular states, respectively (**Figure 2a**). Additionally, we identified 36 transcription factors (TFs) in qMcSCs, 4 of which are also considered hub genes, that we predict act as upstream regulators to drive or maintain  $G_0$  and stemness within this cell population (**Supplemental File 2**). Previous studies have shown that altered expression in 8/36 (23.5%) of these TFs are linked to pigmentary defects in multiple organisms including mice and humans with *Atf3*, *Bcl6*, *Epas1*, *Hes1*, *Myc*, *Sox9*, *Trp63*, and *Vdr* showing increased expression in qMcSCs (Baxter et al., 2018). Further experiments testing the necessity of each hub gene or TFs will elucidate the biological roles these genes have on regulating stemness or  $G_0$  in McSCs. Of particular interest was a cluster of TFs known to be key regulators of immune system processes including the hub gene *Stat3* as well as, *Stat2*, *Irf1*, and *Irf9*. Until now, the relevance and role of immune genes in qMcSCs have not been evaluated.

To further delineate the biological pathways upregulated by qMcSCs, we used functional connectivity to highlight the upregulation of hub genes and their downstream targets within our data. Interconnectivity between the proteins of the 357 genes upregulated in qMcSCs was determined using the STRING (v11.0) database and the network was generated using the Cytoscape (v3.7.1) software package (Szklarczyk et al., 2019; Shannon et al., 2003; Su et al., 2014). The resulting interactome consisted of 265/357 genes with known or predicted PPIs (confidence score > 0.4; text mining, experimental, and database) underlying the regulation of qMcSCs (**Figure 2b**). To uncover downstream biological processes regulated by the previously identified gene hubs, the network was optimized to a radial layout after applying the Kruskal maximal spanning algorithm to trim the total number of edges leaving only the highest combined evidence scored associations between nodes, which resulted in five major branches. Enrichment analysis of the five branches revealed that each includes major biological phenomena that we generally describe as regulation of transcription, biological adhesion, regulation of cell cycle, signaling and cell death, and immune system processes (**Figure 2c**). This finding highlights processes with known roles in  $G_0$  regulation like biological adhesion and regulation of cell cycle, but again highlights the novel process of the immune system as an integral component of the regulation of the qMcSC state.

Further investigation of the normalized RNAseq read counts revealed the immune checkpoint inhibitor *Cd274* is expressed within both melanoblasts and qMcSCs yet is significantly upregulated in the latter. *Cd274* (referred to here as gene name *Pd-I1*) encodes the protein program death-ligand 1 (PD-L1) and was of particular interest as PD-L1 is an immune-evasion mechanism that is coopted in melanoma, an aggressive form of skin cancer involving melanocytes (Dong et al., 1999; Freeman et al., 2000). PD-L1 inhibitors used in cancer immunotherapy were first approved for patients with this disease and have since expanded to include several cancer sub-types (Akinleye and Rasool, 2019; Raedler, 2015). In addition to *Pd-I1* upregulation in qMcSCs, we also found increased expression in *Egfr*, a signal



receptor upstream of *Pd-l1* transcriptional activation (Zhang et al., 2016), and several genes whose proteins are known to directly bind or regulate *Pd-l1* including the hub genes *Stat3*, *Jun* and *Myc* along with the transcription factors *Irf1*, *Stat5a* and *Stat2* (Casey et al., 2016; Garcia-Diaz et al., 2017; Yi et al., 2021). The combined interaction scores between PD-L1 and EGFR, STAT3 and IRF1 (determined by STRINGv11) were found to be the strongest at 0.855, 0.845, and 0.708, respectively (**Figure 2d**). This observation highlights a potential regulatory mechanism involving EGFR, STAT3, and IRF1 in driving PD-L1 expression during G<sub>0</sub> induction in McSCs. These observations are notable because a mechanistic role for PD-L1 in the skin has been insinuated. A small study showed that intradermal injection of anti-PD-L1 inhibitors during early anagen resulted in accelerated hair growth (Zhou et al., 2021). Evidence suggesting a role for PD-L1 in qMcSC regulation also exists. Clinical reports showing elderly patients treated for lung cancer or lymphoma with immunotherapy targeting PD-1/PD-L1 signaling experienced a dramatic side effect—near-complete repigmentation of their age-associated gray hair (Manson et al., 2018; Rivera et al., 2017). Based on these observations we hypothesize that immune system processes play an important role in qMcSCs and that PD-L1 is a marker and potentially a mediator of McSC G<sub>0</sub>. Further support for increased *Pd-l1* expression during G<sub>0</sub> was confirmed through secondary analysis of an existing dataset comparing gene expression changes between qMcSC and their proliferating progeny (Infarinato et al., 2020). In agreement with our findings that higher expression of *Pd-l1* is associated with qMcSCs, data from Infarinato et al. shows that the transition from qMcSC to differentiated McSC progeny results in decreased expression of *Pd-l1*.

In order to understand the broader relevance of our results we also asked whether the core-DEGs identified in qMcSCs are common to those in other G<sub>0</sub> stem cell populations. To answer this, we took advantage of a publicly available gene expression dataset comparing muscle stem cells that reside either in a shallow G<sub>0</sub> state, known as G<sub>Alert</sub>, or a fully G<sub>0</sub> state associated with a reduced rate of reactivation and proliferation (Rodgers et al., 2014). In total, 3241 DEGs (q-value < 0.05, absolute L2FC > 0.5) were found between these two G<sub>0</sub> states. Regardless of gene expression change, a considerable number of genes overlapped with the qMcSC core-DEGs identified above (133/357 genes, 37.5%). Notably, those genes upregulated in the deeper G<sub>0</sub> state in muscle stem cells represented the majority of overlapping expression between these two G<sub>0</sub> stem cell populations (119/133). Analysis of these overlapping genes showed biological processes associated with negative regulation of apoptosis (*Bag3*, *Birc2*, *Egfr*, and *Birc3*), regulation of cell cycle (*Btg2*, *Gadd45b*, and *Junb*) and circadian regulation of gene expression (*Id3*, *Per1*, and *Bhlhe40*) to be enriched in both G<sub>0</sub> melanocyte and muscle stem cells (**Figure 2e**). This overlap also included genes related to protein homeostasis (*Hspa1*), adhesion (*Cadm2*, *Cdh2*, and *Cdh13*), TFs, and stemness (*Arid5a*, *Atf3*, *Col12a1*, *Epas1*, *Hes1*, and *Trp63*) that we noted above in qMcSCs (Figure 1b). Lastly, *Pd-l1* is among the genes expressed at higher levels in both qMcSCs and the more deeply G<sub>0</sub> muscle stem cells, along with the TFs that show connectivity to *Pd-l1* (Figure 2d), *Stat2* and *Jun*. These results suggest that G<sub>0</sub> may be regulated using common mechanisms in melanocyte and muscle stem cell populations and that expression of *Pd-l1* and other immune-related genes may play unappreciated roles in stem cell G<sub>0</sub> *in vivo*.

## **PD-L1 expression at the cell membrane marks a subpopulation of quiescent McSCs *in vivo*.**

To test whether increased transcript abundance of *Pd-l1* during G<sub>0</sub> translates into a spatio-temporal expression pattern of PD-L1 protein that matches when McSCs are G<sub>0</sub> *in vivo*, we evaluated PD-L1 expression across distinct hair cycle stages. Specifically, skin from 2-4-month-old male and female mice was harvested during dormant (telogen), active (anagen), and regressive (catagen) stages of the hair cycle and processed for immunolabeling. During

telogen, PD-L1 is expressed robustly by the innermost layer of hair follicle bulge cells in a position overlapping the location of keratin 6 (K6)-expressing hair follicle cells, and more faintly by the surrounding, outer root sheath layer of hair follicle stem cells and the secondary hair germ. During anagen, PD-L1 expression is modest to absent in the companion layer of the upper hair follicle but not observed in the hair bulb. During catagen, PD-L1 is upregulated in a staining pattern similar to that of telogen with PD-L1 also present in the diminishing epithelial strand in the regressing portion of the hair follicle. PD-L1 is also detectable in the basal layer of the epidermis. Using the melanocyte lineage marker DCT, we clearly show the McSC population localized to the upper permanent portion of the hair follicle during all three stages of the hair cycle (**Figure 3a**). At telogen, in particular, McSCs reside within the outer layer of the hair follicle bulge (not shown) as well as in the secondary hair germ and some appear to also exhibit faint PD-L1 immunolabeling at the cell membrane. Melanocytes in the hair bulb of anagen stage hairs do not exhibit PD-L1 expression.

Using the more sensitive and quantitative technique of flow cytometry, the expression of PD-L1 by McSCs during telogen was confirmed. Dermis from 8-week-old, adult mice were dissociated and assessed for PD-L1 membrane expression, which is detectable in non-permeabilized cells and referred to here as PD-L1<sup>mem+</sup> with non-stained cells referred to as PD-L1<sup>mem-neg</sup>. On average, based on gating above the background of non-stained cells, 11±1.4% of the total dissociated dermal cells were PD-L1<sup>mem+</sup> (**Figure 3b**). As suspected, a portion of KIT+/CD45- McSCs expressed PD-L1<sup>mem+</sup> (12±2.8%), as did the majority of KIT+/CD45+ mast cells (83±3.8%) and some KIT-/CD45+ cells that are presumed to be other CD45-expressing immune cells (7.2±1.5%), the latter two groups of which are known to express PD-L1 physiologically (**Figure 3c**) (Hirano et al., 2021; Qin et al., 2019). We anticipate that the remaining KIT-/CD45- cells that are also colabeled with PD-L1<sup>mem+</sup> (11±1.6%, **Figure 3b**) correspond in part to the PD-L1+ inner layer of hair follicle bulge cells identified in immunolabeled tissue sections (**Figure 3a**). PD-L1<sup>mem+</sup> fluorescence intensity also matches that observed in tissue sections with KIT+/CD45+ mast cells and KIT-/CD45- presumed hair follicle bulge cells having the highest PD-L1<sup>mem+</sup> intensities, while KIT+/CD45- McSCs and KIT-/CD45+ immune cells generally exhibiting lower intensities (**Figure 3d**). In corroboration of our cell sorting approach, KIT+/CD45- McSCs are relatively small in comparison to the total dermal population (based on forward scatter, a measure of cell size; **Figure 3d**) and is an observation that coincides with previous reports (Nishimura et al., 2002)).

Only recently has PD-L1 expression within hair follicles been interrogated (Zhou et al., 2021). Our immunohistochemistry confirms these previous reports that PD-L1 expression fluctuates with hair cycling but extends these initial observations to demonstrate PD-L1 expression at both catagen and telogen stages and more definitely localizing high and low PD-L1 expression to distinct layers of the hair follicle and some McSCs. Additionally, flow cytometric analysis further confirms the novel discovery that PD-L1 is not only expressed at the cell membrane of immune cells within the dermis at telogen but also by some non-immune cells, including a portion of the qMcSC population. Together, this expression pattern advocates for a physiological role for PD-L1 in the hair follicle and McSC dynamics during the regressive and dormant stages of the hair cycle. These results also show that PD-L1<sup>mem+</sup> can be used to identify a subpopulation of qMcSCs *in vivo* that exist in early adulthood and parallels the upregulation of *Pd-l1* gene expression seen in our qMcSCs core-DEGs.

## Developing a method to quiesce melanoblasts *in vitro* to interrogate changes in PD-L1 expression.

To attribute relevance to PD-L1<sup>mem+</sup> expression by qMcSCs *in vivo*, we next asked whether increased PD-L1 is associated specifically with the G<sub>0</sub> program (in contrast to a cell

cycle-independent stem cell program). To test this possibility, we used the *in vitro* culture method of serum deprivation and mitogen withdrawal to specifically induce G<sub>0</sub> in the melb-a melanoblast cell line. Melb-a cells are an immortalized, non-differentiated, non-stem cell line derived originally from McSC precursors isolated from neonatal skin (Sviderskaya et al., 1995). For this G<sub>0</sub> induction method, cells are synchronized to the G<sub>1</sub> phase of the cell cycle using mitogen withdrawal (removal of SCF and bFGF) for one day followed by reducing serum from 10% to 0.1% to induce G<sub>0</sub> and then evaluated using flow cytometry. 5-ethynyl-2'-deoxyuridine (EdU) labeling, which is widely used to visualize cells actively synthesizing DNA (Salic and Mitchison, 2008), demonstrates that two days of serum deprivation (aka, 2-day G<sub>0</sub> cells) is sufficient to stall melb-a cells in the G<sub>0</sub>/G<sub>1</sub> stages of the cell cycle. This contrasts with actively proliferating melb-a cells grown in media with mitogens and 10% serum ('active cells'), which are found distributed across all stages of the cell cycle including the S phase (**Figure 4a**). Immunofluorescent staining showed that 2-day G<sub>0</sub> cells also downregulate the classic cell cycle and proliferation marker mKI67 with 2-day G<sub>0</sub> cells exhibiting roughly 50% of the mKI67+ cells observed in active cells (**Figure 4b**). Since G<sub>0</sub> is defined by reversible arrest, we confirmed the ability of 2-day G<sub>0</sub> cells to re-enter the cell cycle as confirmation of our G<sub>0</sub> methods. To achieve this, we reintroduced the required growth factors for proliferation (mitogens plus 10% serum) to 2-day G<sub>0</sub> cells and used EdU to measure cell cycle reentry. By 18 hours post-activation, reactivated 2-day G<sub>0</sub> cells are distributed across all phases of the cell cycle, with a similar percentage of cells in the S- and G<sub>2</sub>/M-phase of the cell cycle when comparing reactivated 2-day G<sub>0</sub> (45.6%) to active cells (50.6%). Further analysis showed, that in reactivated 2-day G<sub>0</sub> cells the majority of EdU+ cells are concentrated in the S-phase of the cell cycle, a clear indication that G<sub>0</sub> melb-a cells quiesced using our conditions can successfully reenter the cell cycle. (**Figure 4c**). Taken together, these results support the use of this *in vitro* mitogen withdrawal plus serum deprivation method to evaluate the nature of G<sub>0</sub> using the melb-a cell line.

Generally described as a static state of inactivity, cells suspended in G<sub>0</sub> show downregulation of several molecular processes including DNA, RNA, and protein synthesis (Augenlicht and Baserga, 1974; Gray et al., 2004). In comparison to active melb-a cells, 2-day G<sub>0</sub> cells exhibit significant reductions in their total RNA and protein levels (as measured by spectrophotometer) with actively proliferating cells having roughly two times the total RNA and protein content compared to G<sub>0</sub> cells. This low level of RNA and protein remains relatively consistent even if G<sub>0</sub> is extended to 4 days, suggesting that the G<sub>0</sub> program is likely established within the initial 2-day timeframe (**Figure 4d-e**). We further characterized this G<sub>0</sub> program by evaluating the expression of cell cycle genes using qPCR. Two major assumptions are generally made with regards to qPCR experiments: (i) that only a small number of genes are changed between the two sample conditions, and (ii) that the overall size of the transcriptome (RNA content) remains constant across sample conditions (Lovén et al., 2012). We have shown this is not the case for both assumptions. To address these issues, we normalized the mean gene expression values by cell number rather than a standard housekeeping gene; the total cell number required to generate 1ug of RNA was determined by cell sorting. Using this method, 2-day, and 4-day G<sub>0</sub> cells exhibit significant reductions in the expression of the early cell cycle activator genes *Cdk2* and *Cdk4*, as well as *Ki67* (**Figure 4f**). Genes for the known inhibitors of CDKs, *Cdkn1a* (p21), *Cdkn1b* (p27), and *Cdkn2a* (p16), conversely show an increased ratio of expression when compared to their respective interaction partners. As the length of G<sub>0</sub> was extended we observed a significant increase in the ratio of CDKNs to CDKs in 4-day G<sub>0</sub> cells compared to 2-day G<sub>0</sub> cells suggesting that increased lengths of G<sub>0</sub> might alter the rate at which these cells reenter the cell cycle and proliferate (**Figure 4g**). We also confirmed there was a similar reduction in expression of the apoptosis markers cleaved caspase 3 and 8 (Cc3, Cc8) to further rule out the possibility that 2- and 4-day G<sub>0</sub> cells have simply switched to an apoptotic program (**Figure 4h**). In line with our



EdU staining, these results indicate that melb-a cells grown in G<sub>0</sub> media are indeed quiesced; they exhibit classic markers of G<sub>0</sub> and have decreased expression of cell cycle genes but retain the ability to reenter the cell cycle when appropriate conditions are present.

## PD-L1 is a biomarker for quiescence in melanoblasts *in vitro*.

Having established the G<sub>0</sub> nature of melb-a cells after growth in G<sub>0</sub> media and confirming their ability to reactivate and re-enter the cell cycle, we next asked whether these cells also upregulate *Pd-I1* RNA and PD-L1 protein similar to that observed in qMcSCs *in vivo*. Akin to our RNA-seq results we find that *Pd-I1* gene expression is significantly increased in 2- and 4-day G<sub>0</sub> cells compared to active cells (**Figure 5a**). By immunocytochemistry, PD-L1 protein is clearly expressed by both active and 2-day G<sub>0</sub> cells yet undergoes a change in subcellular localization from perinuclear to a more diffuse, membrane or cytoplasmic pattern upon G<sub>0</sub> induction (**Figure 5b**). Using flow cytometry, we confirmed that at least part of this pattern is due to PD-L1 shuttling to the cell membrane of G<sub>0</sub> cells; 2-day G<sub>0</sub> cells exhibit a significant increase in the percentage of cells expressing PD-L1<sup>mem+</sup> as well as a significant increase in the geometric mean fluorescence intensity (gMFI) of PD-L1<sup>mem+</sup> cells over actively proliferating cells (**Figure 5c**). Interestingly, both the percentage and gMFI of PD-L1<sup>mem+</sup> cells continue to increase with the length of G<sub>0</sub> (**Figure 5c**). Given that PD-L1 function and stability relies on its acquisition of post-translational modifications (Hsu et al., 2018; Li et al., 2016), namely N-linked glycosylation, we also evaluated for changes in PD-L1 size by western blotting using the same number of cells across the varying cell states tested. Melb-a cells exhibit three distinct bands that label with PD-L1 antibody (~35, 39, and 45 kDa), a pattern consistent with known PD-L1 N-linked glycosylation patterns (Li et al. 2016). The longer the cells are in G<sub>0</sub>, the abundance of protein in the PD-L1 banding pattern shifts towards the highest molecular weight band, presumably a highly glycosylated version of PD-L1 (**Figure 5d**). This change in the PD-L1 banding pattern is in distinct contrast to the decrease in ubiquitous proteins like ACTIN and PCNA, the latter of which corresponds to the reductions in total protein abundance observed with G<sub>0</sub> cells (**Figure 5d**; compare to Figure 4e). These *in vitro* observations parallel our *in vivo* discovery that *Pd-I1* gene expression is upregulated with G<sub>0</sub> in McSCs and that a portion of qMcSCs in dormant hairs exhibit PD-L1<sup>mem+</sup> expression (**Figure 2, 3**). Altogether, these data provide further plausibility that PD-L1 is in the right place (cell membrane), in the right state (likely glycosylated) and at the right time to play a functional role during G<sub>0</sub> in cells of the melanocyte lineage.

A number of established morphological and molecular characteristics demonstrate that G<sub>0</sub> regulation differs based on the type of cells being studied and the conditions used to induce G<sub>0</sub> (Cheung and Rando, 2013; Collier et al., 2006; Rumman et al., 2015). For instance, our *in vitro* method for inducing G<sub>0</sub> in melb-a cells is achieved by withdrawing the mitogens SCF and bFGF followed by serum deprivation (aka, 2- or 4-day G<sub>0</sub>). During hair cycling *in vivo*, SCF is diminished during telogen and highest around the proliferating hair bulb during anagen (Mak et al., 2006; Peters et al., 2003). This suggests that loss of SCF may be a key factor in regulating G<sub>0</sub> in this context, and we were curious to know whether our *in vitro* model reflects this requirement. Indeed, eliminating just one mitogen at a time during G<sub>0</sub> induction *in vitro* indicated that withdrawal of SCF, but not bFGF, is sufficient to induce a similar percentage of PD-L1<sup>mem+</sup> cells as with full mitogen withdrawal (**Figure 5e**). In addition to mitogen withdrawal, we also found that induction of G<sub>0</sub> using contact inhibition another common method for inducing G<sub>0</sub> (cells grown at high confluency in 0.1% serum and in the presence of SCF and bFGF) resulted in a similar (but less robust) inverse relationship between PD-L1<sup>mem+</sup> and Ki67 expression as observed with mitogen withdrawal (**Figure 5f**). Altogether these observations indicate that endogenous PD-L1<sup>mem+</sup> expression is associated with G<sub>0</sub> in the melanocyte lineage both *in vivo* and *in vitro* and may rely predominately on SCF removal. Our *in vitro* work

also demonstrates that the change in PD-L1 expression observed upon G<sub>0</sub> induction is not unique to the method by which it is initiated, but rather, is a feature of G<sub>0</sub> in these cells. Most importantly, these data counterbalance the abundance of research attributing a role to PD-L1 in cancer and highlight the strong possibility that PD-L1 also participates during G<sub>0</sub> in a physiological and non-tumorigenic sense.

# **The aged qMcSC pool is overall more quiescent and comprised of a larger portion of PD-L1<sup>mem+</sup> qMcSCs.**

Depletion of the McSC pool with age is considered the primary cause of gray hair (Nishimura et al., 2005), however, the phenomenon of gray hair reversal suggests not all McSCs are lost with age (Yale et al., 2020). Beginning at 12 months of age, the maximal length of the telogen stage of the hair cycle gradually increases by up to 32% during a process known as telogen retention (Chen et al., 2014; Cho et al., 2016; Keyes et al., 2013). A consequence of telogen retention is that McSCs are suspended in the G<sub>0</sub> state for increasing lengths of time with age. Previous studies also suggest that the length of G<sub>0</sub> can affect G<sub>0</sub> depth and the ability of G<sub>0</sub> cells to reenter the cell cycle (Kwon 2017). Based on these ideas, we hypothesize that the qMcSC pool is molecularly distinct in young and aged animals and these molecular changes will reflect a McSC's potential for reactivation. To specifically address this question at the transcriptional level we compared gene expression changes between qMcSCs isolated from young and aged female mice using similar RNA-seq analysis methods described above. Using gray hair as a surrogate for age-related McSC pathology, we first confirmed that 24 months is a sufficient age to lead to McSC dysfunction. We collected pelage hairs from the lower back region of adult (9-week, n=5) and aged (24-month, n=4) C57BL/6J female mice by depilation and quantified the presence of pigmentation within the hair shafts as previously described (Anderson et al.). In adult mice, an average of 90% of hairs exhibited high to medium levels of pigmentation whereas in aged mice an average of 65% of hairs show low to no pigmentation with the overall frequency of fully nonpigmented, white hairs reaching 15% (**Figure 6a**). Based on this graying phenotype we anticipate this aged timepoint is sufficient to reveal age and graying-related changes in qMcSC transcriptomics.

Comparing qMcSCs isolated from adult (8-week-old) and aged (24-month-old) female mice using RNAseq we find 916 DEGs (q-value < 0.05, L2FC > 0.5). Basic gene ontology analysis of the upregulated DEGs (256/916) showed low enrichment for a few broad cellular pathways (e.g., central nervous system development, response to external stimulus, cell adhesion) whereas the downregulated DEGs (660/916) showed high enrichment for a set of related processes including translation, ribosome biogenesis and protein trafficking (e.g., protein targeting to membrane, translational initiation, rRNA metabolic process) (**Figure 6b**). A fine balance between low translational activity while also maintaining adequate rRNA synthesis and ribosome biogenesis is an important aspect of inactive stem cells that are poised to reenter the cell cycle (Sharifi et al., 2020). Thus, we interpret the downregulation of genes involved in both protein synthesis and ribosome biogenesis to indicate that the aging of qMcSCs is accompanied by an entrenchment into G<sub>0</sub> (aka, deep G<sub>0</sub>), a state that likely reduces the reactivatability of this aged stem cell pool. Additionally, we found that the senescence-associated secretory phenotype (SASP), which contributes to age-related tissue dysfunction, was not overly represented and only a few upregulated DEGs in aged qMcSCs overlapped with senescence gene lists (comparison made to gene set REACTOME\_SENESCENCE\_ASSOCIATED\_SECRETORY\_PHENOTYPE\_SASP, [www.gsea-msigdb.org](http://www.gsea-msigdb.org); and the SASP Atlas, <http://www.saspatlas.com/>); these included *Anapc15*, *Vgf*, *Serpine1*, *Krt78*, *Krt7*, *Itgax*, *Igf2*, *Hgf* and *C4a*. Notably, other members of the SASP are downregulated including *Fas*, *Igf1*, *Igf2*, *Igf3*, *Igf4*, *Igf5*, *Igf6*, *Igf7*, *Igf8*, *Igf9*, *Igf10*, *Igf11*, *Igf12*, *Igf13*, *Igf14*, *Igf15*, *Igf16*, *Igf17*, *Igf18*, *Igf19*, *Igf20*, *Igf21*, *Igf22*, *Igf23*, *Igf24*, *Igf25*, *Igf26*, *Igf27*, *Igf28*, *Igf29*, *Igf30*, *Igf31*, *Igf32*, *Igf33*, *Igf34*, *Igf35*, *Igf36*, *Igf37*, *Igf38*, *Igf39*, *Igf40*, *Igf41*, *Igf42*, *Igf43*, *Igf44*, *Igf45*, *Igf46*, *Igf47*, *Igf48*, *Igf49*, *Igf50*, *Igf51*, *Igf52*, *Igf53*, *Igf54*, *Igf55*, *Igf56*, *Igf57*, *Igf58*, *Igf59*, *Igf60*, *Igf61*, *Igf62*, *Igf63*, *Igf64*, *Igf65*, *Igf66*, *Igf67*, *Igf68*, *Igf69*, *Igf70*, *Igf71*, *Igf72*, *Igf73*, *Igf74*, *Igf75*, *Igf76*, *Igf77*, *Igf78*, *Igf79*, *Igf80*, *Igf81*, *Igf82*, *Igf83*, *Igf84*, *Igf85*, *Igf86*, *Igf87*, *Igf88*, *Igf89*, *Igf90*, *Igf91*, *Igf92*, *Igf93*, *Igf94*, *Igf95*, *Igf96*, *Igf97*, *Igf98*, *Igf99*, *Igf100*, *Igf101*, *Igf102*, *Igf103*, *Igf104*, *Igf105*, *Igf106*, *Igf107*, *Igf108*, *Igf109*, *Igf110*, *Igf111*, *Igf112*, *Igf113*, *Igf114*, *Igf115*, *Igf116*, *Igf117*, *Igf118*, *Igf119*, *Igf120*, *Igf121*, *Igf122*, *Igf123*, *Igf124*, *Igf125*, *Igf126*, *Igf127*, *Igf128*, *Igf129*, *Igf130*, *Igf131*, *Igf132*, *Igf133*, *Igf134*, *Igf135*, *Igf136*, *Igf137*, *Igf138*, *Igf139*, *Igf140*, *Igf141*, *Igf142*, *Igf143*, *Igf144*, *Igf145*, *Igf146*, *Igf147*, *Igf148*, *Igf149*, *Igf150*, *Igf151*, *Igf152*, *Igf153*, *Igf154*, *Igf155*, *Igf156*, *Igf157*, *Igf158*, *Igf159*, *Igf160*, *Igf161*, *Igf162*, *Igf163*, *Igf164*, *Igf165*, *Igf166*, *Igf167*, *Igf168*, *Igf169*, *Igf170*, *Igf171*, *Igf172*, *Igf173*, *Igf174*, *Igf175*, *Igf176*, *Igf177*, *Igf178*, *Igf179*, *Igf180*, *Igf181*, *Igf182*, *Igf183*, *Igf184*, *Igf185*, *Igf186*, *Igf187*, *Igf188*, *Igf189*, *Igf190*, *Igf191*, *Igf192*, *Igf193*, *Igf194*, *Igf195*, *Igf196*, *Igf197*, *Igf198*, *Igf199*, *Igf200*, *Igf201*, *Igf202*, *Igf203*, *Igf204*, *Igf205*, *Igf206*, *Igf207*, *Igf208*, *Igf209*, *Igf210*, *Igf211*, *Igf212*, *Igf213*, *Igf214*, *Igf215*, *Igf216*, *Igf217*, *Igf218*, *Igf219*, *Igf220*, *Igf221*, *Igf222*, *Igf223*, *Igf224*, *Igf225*, *Igf226*, *Igf227*, *Igf228*, *Igf229*, *Igf230*, *Igf231*, *Igf232*, *Igf233*, *Igf234*, *Igf235*, *Igf236*, *Igf237*, *Igf238*, *Igf239*, *Igf240*, *Igf241*, *Igf242*, *Igf243*, *Igf244*, *Igf245*, *Igf246*, *Igf247*, *Igf248*, *Igf249*, *Igf250*, *Igf251*, *Igf252*, *Igf253*, *Igf254*, *Igf255*, *Igf256*, *Igf257*, *Igf258*, *Igf259*, *Igf260*, *Igf261*, *Igf262*, *Igf263*, *Igf264*, *Igf265*, *Igf266*, *Igf267*, *Igf268*, *Igf269*, *Igf270*, *Igf271*, *Igf272*, *Igf273*, *Igf274*, *Igf275*, *Igf276*, *Igf277*, *Igf278*, *Igf279*, *Igf280*, *Igf281*, *Igf282*, *Igf283*, *Igf284*, *Igf285*, *Igf286*, *Igf287*, *Igf288*, *Igf289*, *Igf290*, *Igf291*, *Igf292*, *Igf293*, *Igf294*, *Igf295*, *Igf296*, *Igf297*, *Igf298*, *Igf299*, *Igf300*, *Igf301*, *Igf302*, *Igf303*, *Igf304*, *Igf305*, *Igf306*, *Igf307*, *Igf308*, *Igf309*, *Igf310*, *Igf311*, *Igf312*, *Igf313*, *Igf314*, *Igf315*, *Igf316*, *Igf317*, *Igf318*, *Igf319*, *Igf320*, *Igf321*, *Igf322*, *Igf323*, *Igf324*, *Igf325*, *Igf326*, *Igf327*, *Igf328*, *Igf329*, *Igf330*, *Igf331*, *Igf332*, *Igf333*, *Igf334*, *Igf335*, *Igf336*, *Igf337*, *Igf338*, *Igf339*, *Igf340*, *Igf341*, *Igf342*, *Igf343*, *Igf344*, *Igf345*, *Igf346*, *Igf347*, *Igf348*, *Igf349*, *Igf350*, *Igf351*, *Igf352*, *Igf353*, *Igf354*, *Igf355*, *Igf356*, *Igf357*, *Igf358*, *Igf359*, *Igf360*, *Igf361*, *Igf362*, *Igf363*, *Igf364*, *Igf365*, *Igf366*, *Igf367*, *Igf368*, *Igf369*, *Igf370*, *Igf371*, *Igf372*, *Igf373*, *Igf374*, *Igf375*, *Igf376*, *Igf377*, *Igf378*, *Igf379*, *Igf380*, *Igf381*, *Igf382*, *Igf383*, *Igf384*, *Igf385*, *Igf386*, *Igf387*, *Igf388*, *Igf389*, *Igf390*, *Igf391*, *Igf392*, *Igf393*, *Igf394*, *Igf395*, *Igf396*, *Igf397*, *Igf398*, *Igf399*, *Igf400*, *Igf401*, *Igf402*, *Igf403*, *Igf404*, *Igf405*, *Igf406*, *Igf407*, *Igf408*, *Igf409*, *Igf410*, *Igf411*, *Igf412*, *Igf413*, *Igf414*, *Igf415*, *Igf416*, *Igf417*, *Igf418*, *Igf419*, *Igf420*, *Igf421*, *Igf422*, *Igf423*, *Igf424*, *Igf425*, *Igf426*, *Igf427*, *Igf428*, *Igf429*, *Igf430*, *Igf431*, *Igf432*, *Igf433*, *Igf434*, *Igf435*, *Igf436*, *Igf437*, *Igf438*, *Igf439*, *Igf440*, *Igf441*, *Igf442*, *Igf443*, *Igf444*, *Igf445*, *Igf446*, *Igf447*, *Igf448*, *Igf449*, *Igf450*, *Igf451*, *Igf452*, *Igf453*, *Igf454*, *Igf455*, *Igf456*, *Igf457*, *Igf458*, *Igf459*, *Igf460*, *Igf461*, *Igf462*, *Igf463*, *Igf464*, *Igf465*, *Igf466*, *Igf467*, *Igf468*, *Igf469*, *Igf470*, *Igf471*, *Igf472*, *Igf473*, *Igf474*, *Igf475*, *Igf476*, *Igf477*, *Igf478*, *Igf479*, *Igf480*, *Igf481*, *Igf482*, *Igf483*, *Igf484*, *Igf485*, *Igf486*, *Igf487*, *Igf488*, *Igf489*, *Igf490*, *Igf491*, *Igf492*, *Igf493*, *Igf494*, *Igf495*, *Igf496*, *Igf497*, *Igf498*, *Igf499*, *Igf500*, *Igf501*, *Igf502*, *Igf503*, *Igf504*, *Igf505*, *Igf506*, *Igf507*, *Igf508*, *Igf509*, *Igf510*, *Igf511*, *Igf512*, *Igf513*, *Igf514*, *Igf515*, *Igf516*, *Igf517*, *Igf518*, *Igf519*, *Igf520*, *Igf521*, *Igf522*, *Igf523*, *Igf524*, *Igf525*, *Igf526*, *Igf527*, *Igf528*, *Igf529*, *Igf530*, *Igf531*, *Igf532*, *Igf533*, *Igf534*, *Igf535*, *Igf536*, *Igf537*, *Igf538*, *Igf539*, *Igf540*, *Igf541*, *Igf542*, *Igf543*, *Igf544*, *Igf545*, *Igf546*, *Igf547*, *Igf548*, *Igf549*, *Igf550*, *Igf551*, *Igf552*, *Igf553*, *Igf554*, *Igf555*, *Igf556*, *Igf557*, *Igf558*, *Igf559*, *Igf560*, *Igf561*, *Igf562*, *Igf563*, *Igf564*, *Igf565*, *Igf566*, *Igf567*, *Igf568*, *Igf569*, *Igf570*, *Igf571*, *Igf572*, *Igf573*, *Igf574*, *Igf575*, *Igf576*, *Igf577*, *Igf578*, *Igf579*, *Igf580*, *Igf581*, *Igf582*, *Igf583*, *Igf584*, *Igf585*, *Igf586*, *Igf587*, *Igf588*, *Igf589*, *Igf590*, *Igf591*, *Igf592*, *Igf593*, *Igf594*, *Igf595*, *Igf596*, *Igf597*, *Igf598*, *Igf599*, *Igf600*, *Igf601*, *Igf602*, *Igf603*, *Igf604*, *Igf605*, *Igf606*, *Igf607*, *Igf608*, *Igf609*, *Igf610*, *Igf611*, *Igf612*, *Igf613*, *Igf614*, *Igf615*, *Igf616*, *Igf617*, *Igf618*, *Igf619*, *Igf620*, *Igf621*, *Igf622*, *Igf623*, *Igf624*, *Igf625*, *Igf626*, *Igf627*, *Igf628*, *Igf629*, *Igf630*, *Igf631*, *Igf632*, *Igf633*, *Igf634*, *Igf635*, *Igf636*, *Igf637*, *Igf638*, *Igf639*, *Igf640*, *Igf641*, *Igf642*, *Igf643*, *Igf644*, *Igf645*, *Igf646*, *Igf647*, *Igf648*, *Igf649*, *Igf650*, *Igf651*, *Igf652*, *Igf653*, *Igf654*, *Igf655*, *Igf656*, *Igf657*, *Igf658*, *Igf659*, *Igf660*, *Igf661*, *Igf662*, *Igf663*, *Igf664*, *Igf665*, *Igf666*, *Igf667*, *Igf668*, *Igf669*, *Igf670*, *Igf671*, *Igf672*, *Igf673*, *Igf674*, *Igf675*, *Igf676*, *Igf677*, *Igf678*, *Igf679*, *Igf680*, *Igf681*, *Igf682*, *Igf683*, *Igf684*, *Igf685*, *Igf686*, *Igf687*, *Igf688*, *Igf689*, *Igf690*, *Igf691*, *Igf692*, *Igf693*, *Igf694*, *Igf695*, *Igf696*, *Igf697*, *Igf698*, *Igf699*, *Igf700*, *Igf701*, *Igf702*, *Igf703*, *Igf704*, *Igf705*, *Igf706*, *Igf707*, *Igf708*, *Igf709*, *Igf710*, *Igf711*, *Igf712*, *Igf713*, *Igf714*, *Igf715*, *Igf716*, *Igf717*, *Igf718*, *Igf719*, *Igf720*, *Igf721*, *Igf722*, *Igf723*, *Igf724*, *Igf725*, *Igf726*, *Igf727*, *Igf728*, *Igf729*, *Igf730*, *Igf731*, *Igf732*, *Igf733*, *Igf734*, *Igf735*, *Igf736*, *Igf737*, *Igf738*, *Igf739*, *Igf740*, *Igf741*, *Igf742*, *Igf743*, *Igf744*, *Igf745*, *Igf746*, *Igf747*, *Igf748*, *Igf749*, *Igf750*, *Igf751*, *Igf752*, *Igf753*, *Igf754*, *Igf755*, *Igf756*, *Igf757*, *Igf758*, *Igf759*, *Igf760*, *Igf761*, *Igf762*, *Igf763*, *Igf764*, *Igf765*, *Igf766*, *Igf767*, *Igf768*, *Igf769*, *Igf770*, *Igf771*, *Igf772*, *Igf773*, *Igf774*, *Igf775*, *Igf776*, *Igf777*, *Igf778*, *Igf779*, *Igf780*, *Igf781*, *Igf782*, *Igf783*, *Igf784*, *Igf785*, *Igf786*, *Igf787*, *Igf788*, *Igf789*, *Igf790*, *Igf791*, *Igf792*, *Igf793*, *Igf794*, *Igf795*, *Igf796*, *Igf797*, *Igf798*, *Igf799*, *Igf800*, *Igf801*, *Igf802*, *Igf803*, *Igf804*, *Igf805*, *Igf806*, *Igf807*, *Igf808*, *Igf809*, *Igf810*, *Igf811*, *Igf812*, *Igf813*, *Igf814*, *Igf815*, *Igf816*, *Igf817*, *Igf818*, *Igf819*, *Igf820*, *Igf821*, *Igf822*, *Igf823*, *Igf824*, *Igf825*, *Igf826*, *Igf827*, *Igf828*, *Igf829*, *Igf830*, *Igf831*, *Igf832*, *Igf833*, *Igf834*, *Igf835*, *Igf836*, *Igf837*, *Igf838*, *Igf839*, *Igf840*, *Igf841*, *Igf842*, *Igf843*, *Igf844*, *Igf845*, *Igf846*, *Igf847*, *Igf848*, *Igf849*, *Igf850*, *Igf851*, *Igf852*, *Igf853*, *Igf854*, *Igf855*, *Igf856*, *Igf857*, *Igf858*, *Igf859*, *Igf860*, *Igf861*, *Igf862*, *Igf863*, *Igf864*, *Igf865*, *Igf866*, *Igf867*, *Igf868*, *Igf869*, *Igf870*, *Igf871*, *Igf872*, *Igf873*, *Igf874*, *Igf875*, *Igf876*, *Igf877*, *Igf878*, *Igf879*, *Igf880*, *Igf881*, *Igf882*, *Igf883*, *Igf884*, *Igf885*, *Igf886*, *Igf887*, *Igf888*, *Igf889*, *Igf890*, *Igf891*, *Igf892*, *Igf893*, *Igf894*, *Igf895*, *Igf896*, *Igf897*, *Igf898*, *Igf899*, *Igf900*, *Igf901*, *Igf902*, *Igf903*, *Igf904*, *Igf905*, *Igf906*, *Igf907*, *Igf908*, *Igf909*, *Igf910*, *Igf911*, *Igf912*, *Igf913*, *Igf914*, *Igf915*, *Igf916*, *Igf917*, *Igf918*, *Igf919*, *Igf920*, *Igf921*, *Igf922*, *Igf923*, *Igf924*, *Igf925*, *Igf926*, *Igf927*, *Igf928*, *Igf929*, *Igf930*, *Igf931*, *Igf932*, *Igf933*, *Igf934*, *Igf935*, *Igf936*, *Igf937*, *Igf938*, *Igf939*, *Igf940*, *Igf941*, *Igf942*, *Igf943*, *Igf944*, *Igf945*, *Igf946*, *Igf947*, *Igf948*, *Igf949*, *Igf950*, *Igf951*, *Igf952*, *Igf953*, *Igf954*, *Igf955*, *Igf956*, *Igf957*, *Igf958*, *Igf959*, *Igf960*, *Igf961*, *Igf962*, *Igf963*, *Igf964*, *Igf965*, *Igf966*, *Igf967*, *Igf968*, *Igf969*, *Igf970*, *Igf971*, *Igf972*, *Igf973*, *Igf974*, *Igf975*, *Igf976*, *Igf977*, *Igf978*, *Igf979*, *Igf980*, *Igf981*, *Igf982*, *Igf983*, *Igf984*, *Igf985*, *Igf986*, *Igf987*, *Igf988*, *Igf989*, *Igf990*, *Igf991*, *Igf992*, *Igf993*, *Igf994*, *Igf995*, *Igf996*, *Igf997*, *Igf998*, *Igf999*, *Igf1000*, *Igf1001*, *Igf1002*, *Igf1003*, *Igf1004*, *Igf1005*, *Igf1006*, *Igf1007*, *Igf1008*, *Igf1009*, *Igf1010*, *Igf1011*, *Igf1012*, *Igf1013*, *Igf1014*, *Igf1015*, *Igf1016*, *Igf1017*, *Igf1018*, *Igf1019*, *Igf1020*, *Igf1021*, *Igf1022*, *Igf1023*, *Igf1024*, *Igf1025*, *Igf1026*, *Igf1027*, *Igf1028*, *Igf1029*, *Igf1030*, *Igf1031*, *Igf1032*, *Igf1033*, *Igf1034*, *Igf1035*, *Igf1036*, *Igf1037*, *Igf1038*, *Igf1039*, *Igf1040*, *Igf1041*, *Igf1042*, *Igf1043*, *Igf1044*, *Igf1045*, *Igf1046*, *Igf1047*, *Igf1048*, *Igf1049*, *Igf1050*, *Igf1051*, *Igf1052*, *Igf1053*, *Igf1054*, *Igf1055*, *Igf1056*, *Igf1057*, *Igf1058*, *Igf1059*, *Igf1060*, *Igf1061*, *Igf1062*, *Igf1063*, *Igf1064*, *Igf1065*, *Igf1066*, *Igf1067*, *Igf1068*, *Igf1069*, *Igf1070*, *Igf1071*, *Igf1072*, *Igf1073*, *Igf1074*, *Igf1075*, *Igf1076*, *Igf1077*, *Igf1078*, *Igf1079*, *Igf1080*, *Igf1081*, *Igf1082*, *Igf1083*, *Igf1084*, *Igf1085*, *Igf1086*, *Igf1087*, *Igf1088*, *Igf1089*, *Igf1090*, *Igf1091*, *Igf1092*, *Igf1093*, *Igf1094*, *Igf1095*, *Igf109*

genes, the *Cxcl* genes, *Ccl* genes, or the *Timp* genes (Basisty et al., 2020; Coppé et al., 2010). DEGs between adult and aged qMcSCs also contained some overlap with known genes associated with aging (comparison made to the GenAge database); these included the upregulated DEGs *Igf2*, *Serpine1* and *Sstr3*, and the downregulated DEGs *Fas*, *Igfbp3*, *Lepr*, *Ngfr*, *Nr3c1*, *Prkca*, and *Stk11*. A number of these genes participate in the regulation of metabolism, with the upregulation of *Igf2* along with downregulation of *Igfbp3* and *Stk11* pointing toward enhanced mTOR signaling (Johnson, 2018; van Veelen et al., 2011). Altogether, these observations demonstrate that  $G_0$  in McSCs is not immutable, is uniquely affected by age and this intrinsic aging process is likely SASP-independent. Interestingly, however, the transcriptional changes that accompany aging in qMcSCs point toward two potentially conflicting biological processes, reinforced  $G_0$  on one hand and activation of mTOR on the other hand.

Taking advantage of our previous RNAseq data (**Figure 1-2**; melanoblasts vs. qMcSCs), we also used a cross-sectional approach to investigate the gene expression changes between the three time points evaluated in this paper: P0.5 (melanoblast), 8-week (adult qMcSC), and 24-month (aged qMcSC). We were particularly interested in addressing whether qMcSCs exhibit any signature indicative of a predisposition for McSC differentiation. With age, in both mice and humans, at least of portion McSCs differentiate prematurely and exhibit ectopic pigmentation within the stem cell compartment. In general, age-related McSC loss and hair graying is attributed to this stem cell differentiation mechanism (Nishimura et al., 2005). Within our cross-sectional data we observed 6 patterns of expression (**Figure 6c**); 236/916 DEGs that reverted to a more melanoblast-like expression level compared to adult qMcSCs, 411/916 DEGs specific to aged qMcSCs, 269/916 DEGs showing either progressive up or down-regulation with age. We focused first on ‘reversion to melanoblast-like expression’ patterns because we anticipated these DEGs might reveal a return to a melanoblast-level of melanocyte differentiation markers that were lost when these cells acquired stemness. However, of the 14 DEGs that were higher in both Mbs and aged qMcSCs, none were pigmentation related and not enriched for any pathway. For DEGs with low expression in both Mbs and aged qMcSCs, we interpret these genes as important drivers of the  $G_0$  and stem cell state in McSCs that are lost with age. These DEGs can also be subdivided into genes that are upregulated in adult qMcSCs as part of our core  $G_0$  network (89/222) or non-core  $G_0$  network genes (133/222) and are enriched for genes highlighting early neural crest cell differentiation and mechanisms for cell-cell adhesion (**Figure 6d**). Stem cell niche structure is an important aspect of stem cell self-renewal and inclusion of the cell adhesion molecule COL17A1 in this category suggests potential defects in  $G_0$  entry in aged McSCs (Chen et al., 2013b). COL17a1 is hemidesmosomal protein essential for maintenance of the hair follicle stem cell niche and loss of *Col17a1* results in reduced TGF $\beta$  signaling, the latter of which is necessary to maintain McSC immaturity and  $G_0$  (Nishimura et al., 2010; Tanimura et al., 2011). The DEG *Sfrp1* is also notable because stabilization of nuclear  $\beta$ -catenin drives McSC proliferation and Mc progeny differentiation and SFRP1 negatively regulates canonical  $\beta$ -catenin activity within the hair follicle through WNT signaling (Hawkshaw et al., 2018; Rabbani et al., 2011). One DEG exhibiting the ‘reversion to melanoblast-like expression’ pattern, but not included in any of these enrichment gene lists, is *Nfatc1*; *Nfatc1* is low in both melanoblasts and aged qMcSCs. Within the hair, *Nfatc1* promotes hair follicle stem cell  $G_0$  and is inappropriately maintained in aged hair follicles (Horsley et al., 2008; Keyes et al., 2013). It is important to mention that some of these genes are not considered McSC-specific and underscores the possibility that our sorting protocol, while enriched for Mbs or McSCs, fortuitously contains some hair follicle stem cells and provides a unique readout of both cell types simultaneously. Together the DEGs within the ‘reversion to melanoblast-like expression’ pattern point to dysregulation of pathways



involved in McSC self-renewal and  $G_0$ , but not immediate McSC differentiation, as contributors to aging within qMcSC.

Of the remaining patterns, 'age-specific loss of expression' and 'progressive loss of expression' highlight a dichotomy with our gene expression data. Within the category 'age-specific loss of expression' we enrich for genes that further support the idea that aged qMcSCs may be less  $G_0$  and more prone to loss of self-renewal compared to their more youthful qMcSC counterparts. First, aged McSCs have decreased levels of mTOR inhibitors *Deptor*, *Stk11*, and *Sesn*; mTOR activity defines different states of  $G_0$ ; higher levels are associated with more 'alert'  $G_0$  stem cells that can respond rapidly for tissue repair while lower levels are associated with 'deep'  $G_0$  stem cells that are kept in reserve (Rodgers et al., 2014). Second, aged McSCs also have decreased levels of the BMP signaling inhibitors *Ski*, *Cav1*, and *Smurf1*; during pigment regeneration, BMPs do not appear necessary for maintenance of qMcSCs yet are essential for proper maturation of committed McSC progeny (Infarinato et al., 2020). On the other hand, within the category 'progressive loss of expression' we observe enrichment for the translation and ribosome biogenesis pathways identified in Figure 6B that dominate the enrichment signature for DEGs observed in aged qMcSCs. Including melanoblasts into this comparison reveals that downregulation of protein synthesis is not unique to aged qMcSC but is instead a further reinforcement of the  $G_0$  process acquired during the initial establishment of qMcSCs. Functional heterogeneity of the McSC pool has been observed previously and could explain these conflicting observations (Joshi et al., 2019; Ueno et al., 2014). Due to the nature of bulk RNAseq we are unable to address this possibility transcriptomically, but we anticipate that our data may reflect two independent populations of qMcSCs with different potentials.

To test this idea directly and using PD-L1<sup>mem+</sup> as a biomarker for  $G_0$ , we compared McSCs harvested from the dermis of adult (8-week) and aged (24-month) mice using flow cytometry. Consistent with the canonical stem cell loss pathway, which is likely driven by loss of McSC self-renewal and premature differentiation upon activation, we observed an average of 49% reduction in the overall size of the qMcSC population in aged mice. However, within the remaining McSC population, PD-L1<sup>mem+</sup> qMcSCs were retained and thus represented a greater proportion of the qMcSC pool than observed in the aged qMcSC pool (**Figure 7a**). Similarly, PD-L1 in telogen-stage hairs of aged mice continues to be robustly expressed (**Figure 7b**). The increase in the proportion of PD-L1<sup>mem+</sup> cells in aged qMcSCs is not predicted by gene expression as *Pd-l1* is not a DEG when comparing adult and aged qMcSCs by RNAseq. A similar observation is made *in vitro*; increasing the duration of  $G_0$  in melb-A does not alter *Pd-l1* expression at the transcript level (**Figure 5a**) but does lead to changes in PD-L1 protein localization, PD-L1 protein modifications, and a higher proportion of cells exhibiting PD-L1<sup>mem+</sup> expression (**Figure 5b-d**). This suggests that the post-translational regulation of PD-L1 may be an important aspect of the role of this protein in  $G_0$  cells. Altogether, these data indicate that the adult qMcSC pool is heterogenous and can be split into two groups defined by PD-L1<sup>mem+</sup> and PD-L1<sup>mem-neg</sup> expression. We also show that PD-L1<sup>mem+</sup> and PD-L1<sup>mem-neg</sup> subpopulations are affected differently with age and the composition of the qMcSC pool becomes increasingly represented by PD-L1<sup>mem+</sup> qMcSCs.

## Discussion.

In this study, we interrogated the melanocyte lineage at the transcriptomic level to better understand how aging influences  $G_0$  in McSCs. In contrast to the prevailing view that  $G_0$  cells are simply transcriptomically depressed versions of their active counterparts, we discovered that adult qMcSCs (8-week), in comparison to actively proliferating melanoblasts (P0.5), upregulate a core network of genes represented by five major biological pathways. We anticipate that the genes in these pathways promote, maintain, and/or protect  $G_0$  stem cells.



One branch of genes within this core network highlighted immune system processes, including upregulation of the immune checkpoint inhibitor *Pd-1*. In light of the fact that one side-effect of anti-PD-L1 immunotherapy is gray hair reversal (or reactivation of a defunct regenerative pigment system) (Manson et al., 2018; Rivera et al., 2017) our data implicate PD-L1 as a potential driver for repressing qMcSC activation within gray hairs during aging. By employing a novel method to quiesce immortal melanoblasts *in vitro*, we demonstrate that *Pd-1* transcript and PD-L1 protein expression are both upregulated during the dormant state of  $G_0$  and that  $G_0$  induces localization of PD-L1 to the cell membrane where it is known to function in cell signaling. *In vivo*, PD-L1<sup>mem+</sup> expression identifies a sub-population of qMcSCs as well as K6+ hair follicle cells during the telogen stage of the hair cycle, establishing this protein as a biomarker associated with dormancy (see summary, **Figure 7c**). Notably, PD-L1<sup>mem+</sup> qMcSCs are retained with age whereas PD-L1<sup>mem-neg</sup> qMcSCs are depleted suggesting that PD-L1<sup>mem+</sup> qMcSCs may exist in non-pigmented, gray hairs and could be the target of anti-PD-L1 immunotherapy that leads to gray hair reversal (see summary, **Figure 7c**). We anticipate that the aging mechanisms that explain the loss of PD-L1<sup>mem-neg</sup> qMcSCs and retention of PD-L1<sup>mem+</sup> are reflected in the qMcSC transcriptomics, which suggests two possible biological outcomes. We predict that aged PD-L1<sup>mem-neg</sup> qMcSCs have reduced self-renewal capacity and will prematurely differentiate upon activation leading to their eventual loss (the canonical pathway for hair graying). Conversely, we predict that aged PD-L1<sup>mem+</sup> qMcSCs will become increasingly difficult to reactivate as they decline further into  $G_0$  (a novel, non-canonical pathway for hair graying).

The role of PD-L1 has mostly been explored in the context of immune evasion involving T-cells. Localization of PD-L1 at the cell membrane allows PD-L1 to interact with the programmed death-1 receptor (PD-1) on T-cells, suppressing an immune response and providing cancer cells with immune privilege (Carter et al., 2002; Freeman et al., 2000). In combination with evidence supporting PD-L1 upregulation on cancer cells and its role in escape from the immune response (Iwai et al., 2002; Meng et al., 2018; Zhang et al., 2009), the PD-1/PD-L1 axis has become a significant target for immunotherapy-based clinical cancer research, and treatments targeting this interaction has been approved by the FDA for a variety of cancers including melanoma (Gong et al., 2018). Outside of the cancer context, physiological PD-L1 expression promotes immune tolerance in a variety of human and murine tissues including the thymus, liver, lung, pancreas, eye, and placenta (Bardhan et al., 2016; Keir et al., 2008). Hair follicle immune privilege has long been established and protection of hair follicle stem cells during dormancy is attributed to downregulation of MHC class I molecules that accompanies hair follicle stem cell  $G_0$  (Agudo et al., 2018; Paus et al., 2003). However, until now, no studies have reported PD-L1 upregulation as a possible driver of this privilege process. PD-L1 expression by some qMcSC and K6+ hair follicle cells at telogen suggest that these cells actively regulate their immune detection status and should be tested directly. A physiological role for PD-L1 in  $G_0$ -mediated McSC immune evasion may also help to explain the increase in vitiligo-like lesions in melanoma patients receiving anti-PD-1 or PD-L1 immunotherapies compared to other immunotherapies (Garrett et al., 2021; Guida et al., 2021).

Outside of immune privilege, evidence directly from cancer research also indicates an association between PD-L1 expression and cell cycle state. IFN-gamma is a popular cytokine used to stimulate membrane expression of PD-L1 in both tumorigenic and non-tumorigenic cells but also causes cell cycle arrest (Chin et al., 1996). However, in our *in vitro*  $G_0$  model established above, we demonstrate that PD-L1 membrane expression is elevated in melb-a cells by cell cycle arrest alone, independent of IFN-gamma signaling. In astrocytomas, PD-L1<sup>mem+</sup> expression was highly associated with non-proliferative, KI67-negative cells at the growing edge of tumors (Yao et al., 2009). In this case, PD-L1 expression was independent of tumor stem cell-like properties but dependent on mitogenic availability, and thus the complex

microenvironment observed within solid tumors may explain heterogeneity in PD-L1 expression. Others have shown that CDK4 levels, an essential early-stage protein for re-entry into the cell cycle, can influence the abundance of membrane expression of PD-L1 in multiple tumor cell lines. By inhibiting CDK4 expression and causing cell cycle arrest, degradation of PD-L1 is reduced and results in increased PD-L1<sup>mem+</sup> expression (Zhang et al., 2018). These observations match those that we report in Figure 5b-c demonstrating that differential subcellular localization of PD-L1 (and function of PD-L1) is intimately tied to G<sub>0</sub> status.

Mechanistically, there is some support for the idea that PD-L1 can influence tissue regenerative properties within the skin. In the context of pigmentation, and as mentioned above, a clinical trial involving PD-1/PD-L1 immunotherapy using function-blocking antibodies patients reported near-complete hair repigmentation in elderly patients (13/14) undergoing treatment for lung cancer (Rivera et al., 2017). These findings suggest that gray hairs maintain the capacity for repigmentation, a fact supported by numerous examples (Yale et al., 2020). Based on our discoveries establishing PD-L1 as a biomarker of G<sub>0</sub> and the persistence of PD-L1<sup>mem+</sup> qMcSCs in aged mice, we anticipate that PD-L1 signaling plays a novel role in preserving hyper-dormancy in qMcSCs in gray hairs. Indeed, constitutive expression of PD-L1 in melanoma cell lines results in the decreased expression of several melanin biosynthesis genes including DCT, MITF, MLANA, and TYR a characteristic consistent with G<sub>0</sub> (Chatterjee et al., 2018). Outside of pigmentation, inhibiting PD-L1 during early entry into the anagen stage of the hair cycle accelerates the hair growth rate further indicating a mechanistic role for PD-L1 in preventing the transition from hair dormancy to hair growth (Zhou et al., 2021).

Several studies have shown that the ability of aged stem cell populations to regulate the transition between G<sub>0</sub> and proliferation declines with age (Kalamakis et al., 2019; Leeman et al., 2018; Tümpel and Rudolph, 2019). Reduced frequency of stem cell reactivation and tissue regeneration further contributes to the deterioration of tissue integrity and function overtime (Janzen et al., 2006; Krishnamurthy et al., 2006). A deeper state of G<sub>0</sub> has been used to describe the reduced reactivation rate and prolonged re-entry into the cell cycle of several aged populations of cells *in vivo* including hepatocytes after partial hepatectomy, salivary gland cells after administration of isoproterenol, and muscle stem cell populations following a wounding event (Adelman et al., 1972; Bucher and Swaffield, 1964; Bucher et al., 1964; Liu et al., 2013). However, studies involving parasymbiosis reveal that entrenchment into G<sub>0</sub> may not necessarily be irreversible as the ability to restore tissue homeostasis is retained in several aged cell populations (hepatic, muscle, and neural) that fail to activate appropriately under normal physiological conditions within an aged environment (Conboy et al., 2003; Iakova et al., 2003; Katsimpardi et al., 2014). *In vitro* studies on rat embryonic fibroblasts may explain why this is the case as holding cells in G<sub>0</sub> for increasing lengths requires a stronger stimulating signal in order to reactivate at a rate comparable to cells in a shallower G<sub>0</sub> state (Kwon et al., 2017). These examples in conjunction with the results presented throughout this study point to changes in the depth of G<sub>0</sub> as a novel paradigm for melanocyte stem cell aging in a subpopulation of qMcSCs. This change in qMcSC attributes may be attributed to the fact that qMcSCs sit for longer and longer periods in G<sub>0</sub> as the dormant stage of the hair cycle lengthens during the process of telogen retention (Chen et al., 2014; Cho et al., 2016). Future studies focused on better defining the qMcSC pool using single cell RNAseq and functional assays that directly compare the regenerative potential of PD-L1<sup>mem+</sup> and PD-L1<sup>mem-neg</sup> qMcSCs are warranted. At a minimum, we anticipate that PD-L1<sup>mem+</sup> qMcSCs are a viable, *in-situ* population of deeply quiesced cells that have the potential to be targeted for improved tissue regeneration, which in this case means hair repigmentation. More broadly, evaluating the role of PD-L1 signaling by other G<sub>0</sub> stem cell populations, like muscle stem cells (**Figure 2e**), is also warranted.

654  
655  
656  
657  
658  
659  
660  
661  
662  
663  
664  
665  
666  
667  
668  
669  
670  
671  
672  
673  
674  
675  
676  
677  
678  
679  
680  
681  
682  
683  
684  
685  
686  
687  
688  
689  
690  
691  
692  
693  
694  
695  
696  
697  
698  
699  
700  
701  
702  
703  
704

## **Acknowledgments:**

This research was supported by funding provided to MLH from the National Institute on Aging (R00AG047128), the UAB Faculty Development Grant Program, and start-up funds from the Department of Biology and College of Arts of Science at the University of Alabama, Birmingham. Fellowship support was also provided independently to JWP (UAB Blazer Fellowship). We also would like to give special thanks to Zoya T. Anderson and Christopher R. Keys for their valuable insights, feedback, and moral support during this study.

## **Author Contribution:**

Conceptualization: Joseph W. Palmer, Melissa L. Harris

Data curation: Joseph W. Palmer, Kyrene M. Villavicencio, Misgana Idris, Melissa L. Harris

Formal analysis: Joseph W. Palmer, Kyrene M. Villavicencio, Misgana Idris, Melissa L. Harris

Funding acquisition: Joseph W. Palmer, Melissa L. Harris

Investigation: Joseph W. Palmer, Kyrene M. Villavicencio, Dominique Weddle, Misgana Idris, Melissa L. Harris

Methodology: Joseph W. Palmer, Kyrene M. Villavicencio, Misgana Idris, Fabian V. Filipp, NISC Comparative Sequencing Program, Melissa L. Harris

Project administration: Melissa L. Harris, Joseph W. Palmer

Resources: William J. Pavan, Melissa L. Harris

Software: Joseph W. Palmer

Supervision: Joseph W. Palmer, Melissa L. Harris

Validation: Joseph W. Palmer, Kyrene M. Villavicencio, Misgana Idris, Melissa Harris

Visualization: Joseph W. Palmer, Melissa Harris

Writing – original draft: Joseph W. Palmer, Melissa L. Harris

Writing – review & editing: Joseph W. Palmer, Melissa L. Harris

## **Declaration of Interests:**

All authors declare no competing interests.

## Materials and Methods

### Ethics statement

Animal care and experimental animal procedures were performed in accordance with the guidelines set forth by the Public Health Service and Office of Laboratory Animal Welfare as designated by the Institutional Animal Care and Use Committee associated with UAB and NHGRI. This research is associated with the following animal protocols: UAB 20382 (to MLH), NHGRI G-94-7 (to WJP).

### Animals

Animals used for RNA-seq were housed at the animal facilities at NHGRI. C57BL/6J wildtype females (8-week-old) and pups (P0.5) were derived from in-house mating of C57BL/6J mice obtained from The Jackson Laboratory (JAX, JAX:000664, RRID: IMSR\_JAX:000664). C57BL/6 wild-type female mice (24-month-old) were obtained through the NIA Aged Rodent Colony (Charles River Laboratories, RRID:SCR\_007317) at 21 months old and allowed to age to 24 months within the same facility as the adult 8-week-old and P0.5 pups to which they were compared.

Animals used for flow cytometry, IHC, and hair analysis were housed at the animal facilities at UAB. C57BL/6J wildtype mice used for the flow cytometry (8-week-old female) data presented in Figure 3b-d were obtained from JAX. A combination of C57BL/6 wild-type mice from JAX and the NIA Aged Rodent Colony were used for the IHC data presented in Fig. 3a (2-4-month old males and females) and Fig. 7b (24-month-old females), and the hair shaft color analysis in Fig. 6a. For IHC, some of these animals were depilated before skin harvest to synchronize the hair cycle (anagen and catagen). C57BL/6 wild-type mice (10-week-old and 24-month-old) used for the flow cytometry data presented in Fig. 7a were obtained from the NIA Aged Rodent Colony. All animals transferred to UAB were acclimatized within the mouse facilities for at least one week prior to experimentation.

### Melanoblast and McSC enrichment

Dermis from postnatal day 0.5, 8-10-week, and 24-month mouse body skin was dissociated and processed using FACS to obtain enriched populations of melanoblasts, adult and aged qMcSCs, respectively (Harris et al., 2018). Cells of the melanocyte lineage were identified by their surface expression of the receptor KIT. Melanoblasts in the P0.5 dermis are located within developing hair follicles (Peters 2002). Enrichment for quiescent McSCs at both the adult and aged timepoints was achieved by isolating KIT+CD45- cells from mouse skin whose hair was in the telogen stage of the hair cycle. McSC enrichment at telogen is dependent on the fact that telogen hairs contain only McSCs and do not contain differentiated melanocytes (Nishimura 2002). The telogen stage of the hair cycle was confirmed by the pinkness of the skin (Muller-Rover 2001).

In brief, trunk skin was obtained and the subcutis removed by gentle scraping with curved forceps. The remaining skin was incubated at 37°C in 0.25% Trypsin-EDTA (Gibco 25200-056) for 20 minutes and then the dermis was separated from the epidermis by gentle scraping with curved forceps. The resulting dermis was minced using curved surgical scissors and dissociated by enzymatic treatment with 0.3mg/mL Liberase TL (Roche 0540102001) for 45-50 minutes at 37°C. Enzymatic digestion was stopped using a solution of DMEM containing 20% FBS and 0.5 mg/ml Dnase (Sigma DN-25). The dermis was physically disrupted by forcefully passing the dermal cell solution through a 70 µm Filcon filter (070-67S) fitted to a 50mL luerlock syringe (Soft-Ject, 8300006682). Cells were washed using a freshly prepared FACS wash solution consisting of 1X DPBS, 5% FBS, 25mM HEPES (Gibco 15630-080), and 2mM EDTA before being pelleted at 350 x g for 7 min at 4°C. Cells were resuspended and



stained using cell surface antibody markers preconjugated to a fluorophore: KIT (CD117, BD Pharmingen 25-1171-82, RRID: AB\_469644), CD45.2 (BD Biosciences 553772, RRID:AB\_395041) and PD-L1 (Invitrogen 12-5982-82, RRID:AB\_466089). Fluorescence was assessed using an S3e Biorad cell sorter equipped with 488/561 lasers or a FACS Aria (Becton Dickinson). Cells of the melanocyte lineage were positively selected by gating on the KIT+/CD45.2- cell population while mast cells were negatively selected by removing double-positive KIT+/CD45.2+ cells. Analysis of cell sorting data was performed using FlowJo software (V10.6.0, RRID:SCR\_008520).

## RNA isolation

Cellular RNA was purified using the Directzol RNA Miniprep Kit (Zymo R2062). For RNA-seq, RNA was treated with 0.8U/μl RNase inhibitor. RNA was quantified using a Qubit fluorometer. RNA quality was determined by Bioanalyzer and RNA samples with a RIN score >8.5 were used for sequencing. For qPCR, RNA was isolated similarly but quantified using an Epoch spectrophotometer (Biotek).

## RNA-seq and differential gene expression analysis

McSCs from 3-4 animals were pooled to generate enough RNA to serve as one biological replicate. Amplified cDNA was created from 20 ng total RNA using the Ovation RNA-Seq System V2 (Tecan Genomics). The cDNA was fragmented using a Covaris E210 before proceeding to library construction with 1000ng cDNA using TruSeq RNA Sample Prep Kit, version 2 (Illumina) using 10 PCR cycles. Libraries were pooled in equimolar ratio and sequenced together on a HiSeq 2500 with version 3 flow cells and sequencing reagents. At least 60 million 126-base read pairs were generated for each library. Data were processed using RTA 1.18.64 and CASAVA 1.8.2. RNA-seq reads that passed the Illumina platform quality check were used for downstream analyses.

Bam files were assessed for low-quality reads and removed before converting to fastq file format using samtools (v1.9, RRID:SCR\_014583) and Bam2fastq (v1.1.0) software. Read quality was assessed using FastQC (v0.11.8, RRID:SCR\_014583) and trimming was performed using Trimmomatic (v0.36, RRID:SCR\_011848). Reads with a Phred quality score of 30 were pairwise removed and the remaining paired reads were trimmed to an average length of 90 base pairs. Reads were aligned to the Ensembl (RRID:SCR\_002344) mouse mm10 reference genome with the STAR (v2.5.2, RRID:SCR\_015899) aligner software using default parameters, and count tables were generated using the STAR genecounts feature and full Ensembl GTF annotation file. Differential gene expression analysis was performed using DESeq2 (v1.22.2, RRID:SCR\_015687) package in R using default settings. All sequencing data generated in this study are available at NCBI GEO under accession GSE#####.

Heatmaps were generated by applying the regularized log transformation (rlog) to the results data frame produced by the DESeq2 package. To generate figures, the rlog values for filtered genes of interest were loaded into the pheatmap (RRID:SCR\_016418) R package and scaled by row. Core networks were generated using 0.4 confidence protein-protein interactions using the experimental, database, and text mining information obtained from the STRING (v11.0, RRID:SCR\_005223) database. Visualization and optimization of the network layout were performed using Cytoscape (v3.7.1, RRID:SCR\_003032) and the plug-in Cyspanning tree (v1.1). In brief, unconnected small trees (2-3 nodes) were removed before applying a maximal Kruskal algorithm on the combined evidence scores for edges and a radial layout was used to visualize the resulting branches. Hub proteins and transcription factors were determined by using publicly available data provided by the Enrichr database (RRID:SCR\_001575) and AnimalTFDB (RRID:SCR\_001624) respectively. Enrichment analysis of biological processes was performed using the Molecular Signatures Database (MSigDB v6.2, RRID:SCR\_016863) through the Gene Set Enrichment Analysis website

platform or the Panther Database (Release 17.0, RRID: SCR\_004869). Visualization of data and generation of the clustered bar graphs were performed using the ggplot2 (RRID:SCR\_014601) R-package.

### qRT-PCR analysis

For each biological replicate,  $1 \times 10^6$  cells were isolated by flow cytometry and  $1 \mu\text{g}$  of purified RNA was reverse transcribed into cDNA using the High Capacity cDNA Reverse Transcription Kit (Thermo Fisher Scientific 4368813). A standard curve was used to determine the mean quantity value of target transcripts between conditions and across three technical replicates per sample. TaqMan Fast Universal PCR Master Mix (Thermo Fisher Scientific 4444965) and Taqman gene expression assays were used for amplification. Gene expression assays used in this study included Pdl1 (Cd274, Mm03048248\_m1), Cdk2 (Mm00443947\_m1), Cdk4 (Mm00726334\_s1), Cdkn1a (Mm01303209\_m1), Cdkn1b (Mm00438168\_m1), Cdkn2a (Mm00494449\_m1), mKi67 (Mm01278617\_m1), Cc3 (Mm01195085), Cc8 (Mm01255716). Expression was assessed on a QuantStudio 3 (Thermo Fisher) using the default fast reaction settings. Gene expression was normalized by cell number to account for the change in the transcriptome size of cells across cellular states.

$$\text{Relative expression} = \frac{\text{Mean quantity value of sample}}{\# \text{ of cells in } 1 \mu\text{g cDNA reaction}}$$

The ratio of cyclin-dependent kinase inhibitors to their respective cyclin-dependent kinases for individual samples across conditions was calculated using the following formula.

$$\text{Ratio} = \frac{\text{Average Cdkn expression}}{\text{Average Cdk expression}}$$

### Immunolabeling

For immunohistochemistry, the skin was immersed in freshly made 2% methanol-free formaldehyde (Thermo Fisher Scientific 28908) in 1X DPBS (w/o Mg and Ca, Gibco 14190-144) for 30 minutes on ice and washed for 24 hours in 1X DPBS at  $4^\circ\text{C}$ . Skin samples were then cryoprotected by placing them in 10% sucrose (Fisher S5-500) in 1X DPBS for additional 24 hours at  $4^\circ\text{C}$  prior to freezing in O.C.T. (Fisher 23-730-571).  $10 \mu\text{m}$  thick cryosections of skin were cut using a cryostat (Thermo Fisher Scientific NX50) and stored at  $-80^\circ\text{C}$ . Prior to immunolabeling, slides were immersed into 4% formaldehyde for 15 minutes, washed briefly, and heated to near boiling in 10mM citrate buffer with 0.05% Tween for 2 minutes.

For immunocytochemistry, cells were grown on 8- or 4-well chamber slides. Cells were washed with 1X DPBS and fixed using 2% methanol-free formaldehyde in 1X DPBS for 30 minutes at room temperature followed by two rounds of additional washing with 1X DPBS before staining.

Immunolabeling was performed by washing slides in a 1X DPBS and 0.1% Tween 20 (Fisher BP337-500) solution (PBST) for 20 minutes before incubation with primary antibodies overnight at  $4^\circ\text{C}$  (for sections) or 30-60 minutes at room temperature (for cells). Slides were washed in PBST solution for 15 minutes followed by incubation with appropriate secondary antibodies (1:2000-1:3000, AlexaFluor, Invitrogen) for 2 hours (for sections) or 30 minutes (for cells). Following antibody incubation, slides were washed in PBST for 15-20 minutes and coverslips mounted with Fluoromount-G with DAPI (Thermo Fisher Scientific 00-4959-52). Primary antibodies used for immunolabeling included: anti-PD-L1 (1:100, Thermo Fisher Scientific 14-5982-82, RRID:AB\_467781), anti-DCT (1:400, anti-TRP-2, Santa Cruz Biotechnology sc-10451, RRID:AB\_793582), anti-K6a (1:500, Biolegend 905701,

RRID:AB\_2565052), and anti-KI67 (1:100, Abcam ab16667, RRID:AB\_302459). Fluorescence microscopy and imaging were performed either on an EVOS FL Cell Imaging System (Thermo Fisher Scientific) or Eclipse 80i microscope (Nikon). Images were processed using Adobe Photoshop.

### Hair counts

Hair shaft pigmentation was quantified by a binning method developed previously in our lab (Anderson et al.). Briefly, hairs were classified as high, medium, or low black (depending on the amount of white space within the medullary air pockets), and white (essentially no visible pigment granules). All analyses were performed blind to sample age. A minimum of 200 hairs were counted per adult sample (n=5) and over 1000 hairs per aged sample (n=4).

### Cell culture

Melb-a cells (RRID: CVCL\_C693) were obtained from the Wellcome Trust Functional Genomics Cell Bank (Sviderskaya et al., 1995). For general cell growth and passaging, cells were incubated at 37°C and 10% CO<sub>2</sub> in “full media” consisting of a RPMI 1640 with L-Glutamine (RPMI, Gibco, 11875-093) supplemented with 10% heat-inactivated fetal bovine serum (hi-FBS, Gibco, 16140-071), 100U/mL Penicillin/100ug/mL Streptomycin (pen/strep, Gibco, 15140-122), 20ng/mL SCF (Thermo Fisher Scientific PMC2111) and 0.6ng/mL bFGF (Stemgent 03-0002).

For assessment of actively proliferating cells, cells in sub-confluent T-75 filtered flasks (Thermo Fisher Scientific 156499) were split 1:4 into fresh T-75 flasks, incubated in full media, and harvested 24 hours later at roughly 50% confluency.

For assessment of quiescent cells, G<sub>0</sub> was induced using serum deprivation or contact inhibition. Serum deprivation was achieved by first syncing subconfluent cells to the G<sub>1</sub> stage of the cell cycle by thoroughly washing the cells in 1X DPBS and incubating them in media without the mitogens SCF and bFGF (RPMI, pen/strep, and 10% hi-FBS). Following mitogen withdrawal, cells were washed with 1X DPBS and incubated in media without mitogens and with low serum (RPMI, pen/strep, and 0.1% hi-FBS) for either 48 (2-day) or 96 (4-day) hours before harvesting. Contact inhibition was achieved by plating cells at 10% confluency (Lo) or 100% confluency (Hi) for 24 hours prior to switching to media with low serum (RPMI, pen/strep, and 0.1% hi-FBS) and with or without mitogens for 72 hours.

### Protein quantification and western blot analysis

For total protein quantification, 1 x 10<sup>6</sup> FACS-isolated melb-a cells were lysed in RIPA buffer and total protein was quantified using a standard BCA protocol and Epoch spectrophotometer.

For western blot analysis, 1 x 10<sup>6</sup> FACS-isolated melb-A cells were lysed in freshly prepared 1X Laemmli buffer at a concentration of 10,000 cells per µl. Samples were briefly sonicated and boiled at 95 °C for 5 minutes. Equal volumes of the sample were loaded onto a 12% polyacrylamide gel and electrophoresed at 100 volts for 1 hour before being transferred to a PVDF membrane using the iBlot 2 system (Thermo Fisher Scientific IB21001). Membrane blocking was performed at room temperature in 3% nonfat dried milk in PBST for 1 hour before incubating overnight with primary antibodies (1:1000 in PBST) at 4°C. After washing in PBST, the membrane was incubated with HRP-conjugated secondary antibodies (1:10,000 in PBST) for 1 hour at room temperature. Pierce ECL Western Blotting Substrate (Thermo Fisher Scientific 32106) was applied directly to the membrane for band detection and imaged using Bio-Rad ChemiDoc XRS+ System (Bio-Rad Laboratories, RRID:SCR\_008426). Image analysis and densitometry of protein bands were performed using Image Lab software (v6.0.1, Image

Lab Software, RRID:SCR\_014210). Primary antibodies used for WB analysis included: anti-PDL1 (Abcam, ab269684, RRID:AB\_2832197), anti-PCNA (Abcam, ab29, RRID:AB\_303394), and anti-alpha-Smooth Muscle Actin (Thermo Fisher Scientific, PA5-16697, RRID:AB\_11000908). Secondary antibodies employed were HRP conjugated, anti-mouse IgG (Thermo Fisher Scientific, 62-6520, RRID: AB\_2533947), and anti-rabbit IgG (Cell Signaling Technology, 7074, RRID: AB\_2099233).

### EdU assay

DNA synthesis was visualized using the flow cytometry EdU Click-iT assay (Thermo Fisher Scientific c10632) following manufacturer guidelines and carried out at room temperature and protected from light. Briefly, cells were incubated in media supplemented with 10  $\mu$ M EdU for 2 hours at 37°C and 10% CO<sub>2</sub> and washed in 1% BSA in 1X DPBS prior to harvesting. Cells were resuspended in 100  $\mu$ L of Click-iT fixative for 15 minutes. Cells were washed and resuspended in 100  $\mu$ L of 1X Click-iT saponin-based permeabilization and wash reagent for an additional 15 minutes before adding 0.5 mL of freshly prepared Click-iT reaction cocktail and incubated for 30 minutes. Cells were washed and resuspended in 500  $\mu$ L 1X Click-iT saponin-based permeabilization and wash reagent and immediately analyzed using an S3e BioRad cell sorter.

### **Supplemental Information:**

Supplemental File 1: RNA-seq differential expression results comparing melanoblast (P0.5) to adult (8-week) McSCs and adult (8-week) McSCs to aged McSCs (24-month), along with core network information.

Supplemental File 2: Complete list of Hub Genes and TFs identified as having differential expression between melanoblast (P0.5) and adult (8-week) mice.

Supplemental File 3: Cross-sectional analysis of melanoblast (P0.5), adult (8-week) McSCs, and aged McSCs (24-month) DEGs including gene ontology analysis.



# References:

- Adelman, R.C., Stein, G., Roth, G.S., and Englander, D. (1972). Age-dependent regulation of mammalian DNA synthesis and cell proliferation In vivo. *Mech. Ageing Dev.* 1, 49–59. [https://doi.org/10.1016/0047-6374\(72\)90052-8](https://doi.org/10.1016/0047-6374(72)90052-8).
- Agudo, J., Park, E.S., Rose, S.A., Alibo, E., Sweeney, R., Dhainaut, M., Kobayashi, K.S., Sachidanandam, R., Baccarini, A., Merad, M., et al. (2018). Quiescent Tissue Stem Cells Evade Immune Surveillance. *Immunity* 48, 271-285.e5. <https://doi.org/10.1016/j.immuni.2018.02.001>.
- Ahmed, A.S.I., Sheng, M.H., Wasnik, S., Baylink, D.J., and Lau, K.-H.W. (2017). Effect of aging on stem cells. *World J. Exp. Med.* 7, 1–10. <https://doi.org/10.5493/wjem.v7.i1.1>.
- Akinleye, A., and Rasool, Z. (2019). Immune checkpoint inhibitors of PD-L1 as cancer therapeutics. *J. Hematol. Oncol.* 12, 92. <https://doi.org/10.1186/s13045-019-0779-5>.
- Anderson, Z.T., Palmer, J.W., Idris, M.I., Villavicencio, K.M., Le, G., Cowart, J., Weinstein, D.E., and Harris, M.L. Topical RT1640 treatment effectively reverses gray hair and stem cell loss in a mouse model of radiation-induced canities. *Pigment Cell Melanoma Res.* *n/a*. <https://doi.org/10.1111/pcmr.12913>.
- Augenlicht, L.H., and Baserga, R. (1974). Changes in the G0 state of WI-38 fibroblasts at different times after confluence. *Exp. Cell Res.* 89, 255–262. [https://doi.org/10.1016/0014-4827\(74\)90789-7](https://doi.org/10.1016/0014-4827(74)90789-7).
- Bardhan, K., Anagnostou, T., and Boussiotis, V.A. (2016). The PD1:PD-L1/2 Pathway from Discovery to Clinical Implementation. *Front. Immunol.* 7. <https://doi.org/10.3389/fimmu.2016.00550>.
- Basisty, N., Kale, A., Jeon, O.H., Kuehnemann, C., Payne, T., Rao, C., Holtz, A., Shah, S., Sharma, V., Ferrucci, L., et al. (2020). A proteomic atlas of senescence-associated secretomes for aging biomarker development. *PLOS Biol.* 18, e3000599. <https://doi.org/10.1371/journal.pbio.3000599>.
- Baxter, L.L., Watkins-Chow, D.E., Pavan, W.J., and Loftus, S.K. (2018). A curated gene list for expanding the horizons of pigmentation biology. *Pigment Cell Melanoma Res.* <https://doi.org/10.1111/pcmr.12743>.
- Bucher, N.L.R., and Swaffield, M.N. (1964). The Rate of Incorporation of Labeled Thymidine into the Deoxyribonucleic Acid of Regenerating Rat Liver in Relation to the Amount of Liver Excised. *Cancer Res.* 24, 1611–1625. .
- Bucher, N.L., Swaffield, M.N., and Dittroia, J.F. (1964). THE INFLUENCE OF AGE UPON THE INCORPORATION OF THYMIDINE-2-C14 INTO THE DNA OF REGENERATING RAT LIVER. *Cancer Res.* 24, 509–512. .
- Carter, L., Fouser, L.A., Jussif, J., Fitz, L., Deng, B., Wood, C.R., Collins, M., Honjo, T., Freeman, G.J., and Carreno, B.M. (2002). PD-1:PD-L inhibitory pathway affects both CD4(+) and CD8(+) T cells and is overcome by IL-2. *Eur. J. Immunol.* 32, 634–643. [https://doi.org/10.1002/1521-4141\(200203\)32:3<634::AID-IMMU634>3.0.CO;2-9](https://doi.org/10.1002/1521-4141(200203)32:3<634::AID-IMMU634>3.0.CO;2-9).

977 Casey, S.C., Tong, L., Li, Y., Do, R., Walz, S., Fitzgerald, K.N., Gouw, A.M., Baylot, V.,  
978 Gütgemann, I., Eilers, M., et al. (2016). MYC regulates the antitumor immune response  
979 through CD47 and PD-L1. *Science* 352, 227–231. <https://doi.org/10.1126/science.aac9935>.

980 Chatterjee, A., Rodger, E.J., Ahn, A., Stockwell, P.A., Parry, M., Motwani, J., Gallagher, S.J.,  
981 Shklovskaya, E., Tiffen, J., Eccles, M.R., et al. (2018). Marked Global DNA Hypomethylation Is  
982 Associated with Constitutive PD-L1 Expression in Melanoma. *IScience* 4, 312–325.  
983 <https://doi.org/10.1016/j.isci.2018.05.021>.

984 Chen, C.-C., Murray, P.J., Jiang, T.X., Plikus, M.V., Chang, Y.-T., Lee, O.K., Widelitz, R.B.,  
985 and Chuong, C.-M. (2014). Regenerative Hair Waves in Aging Mice and Extra-Follicular  
986 Modulators Follistatin, Dkk1, and Sfrp4. *J. Invest. Dermatol.* 134, 2086–2096.  
987 <https://doi.org/10.1038/jid.2014.139>.

988 Chen, E.Y., Tan, C.M., Kou, Y., Duan, Q., Wang, Z., Meirelles, G.V., Clark, N.R., and Ma'ayan,  
989 A. (2013a). Enrichr: interactive and collaborative HTML5 gene list enrichment analysis tool.  
990 *BMC Bioinformatics* 14, 128. <https://doi.org/10.1186/1471-2105-14-128>.

991 Chen, S., Lewallen, M., and Xie, T. (2013b). Adhesion in the stem cell niche: biological roles  
992 and regulation. *Dev. Camb. Engl.* 140, 255–265. <https://doi.org/10.1242/dev.083139>.

993 Cheung, T.H., and Rando, T.A. (2013). Molecular regulation of stem cell quiescence. *Nat. Rev.*  
994 *Mol. Cell Biol.* 14. <https://doi.org/10.1038/nrm3591>.

995 Cheung, H.-H., Pei, D., and Chan, W.-Y. (2015). Stem cell aging in adult progeria. *Cell Regen.*  
996 4. <https://doi.org/10.1186/s13619-015-0021-z>.

997 Chin, Y.E., Kitagawa, M., Su, W.-C.S., You, Z.-H., Iwamoto, Y., and Fu, X.-Y. (1996). Cell  
998 Growth Arrest and Induction of Cyclin-Dependent Kinase Inhibitor p21WAF1/CIP1 Mediated by  
999 STAT1. *Science* 272, 719–722. <https://doi.org/10.1126/science.272.5262.719>.

1000 Cho, A.-R., Kim, J.Y., Munkhbayer, S., Shin, C.-Y., and Kwon, O. (2016). p21 upregulation in  
1001 hair follicle stem cells is associated with telogen retention in aged mice. *Exp. Dermatol.* 25,  
1002 76–78. <https://doi.org/10.1111/exd.12862>.

1003 Cho, I.J., Lui, P.P., Obajdin, J., Riccio, F., Stroukov, W., Willis, T.L., Spagnoli, F., and Watt,  
1004 F.M. (2019). Mechanisms, Hallmarks, and Implications of Stem Cell Quiescence. *Stem Cell*  
1005 *Rep.* 12, 1190–1200. <https://doi.org/10.1016/j.stemcr.2019.05.012>.

1006 Coller, H.A., Sang, L., and Roberts, J.M. (2006). A New Description of Cellular Quiescence.  
1007 *PLOS Biol.* 4, e83. <https://doi.org/10.1371/journal.pbio.0040083>.

1008 Conboy, I.M., Conboy, M.J., Smythe, G.M., and Rando, T.A. (2003). Notch-Mediated  
1009 Restoration of Regenerative Potential to Aged Muscle. *Science* 302, 1575–1577.  
1010 <https://doi.org/10.1126/science.1087573>.

1011 Coppé, J.-P., Desprez, P.-Y., Krtolica, A., and Campisi, J. (2010). The Senescence-Associated  
1012 Secretory Phenotype: The Dark Side of Tumor Suppression. *Annu. Rev. Pathol.* 5, 99–118.  
1013 <https://doi.org/10.1146/annurev-pathol-121808-102144>.

- 1014 Dong, H., Zhu, G., Tamada, K., and Chen, L. (1999). B7-H1, a third member of the B7 family,  
1015 co-stimulates T-cell proliferation and interleukin-10 secretion. *Nat. Med.* 5, 1365–1369.  
1016 <https://doi.org/10.1038/70932>.
- 1017 Du, J., Chen, Y., Li, Q., Han, X., Cheng, C., Wang, Z., Danielpour, D., Dunwoodie, S.L.,  
1018 Bunting, K.D., and Yang, Y.-C. (2012). HIF-1 $\alpha$  deletion partially rescues defects of  
1019 hematopoietic stem cell quiescence caused by Cited2 deficiency. *Blood* 119, 2789–2798.  
1020 <https://doi.org/10.1182/blood-2011-10-387902>.
- 1021 Fox, A.D., Hescott, B.J., Blumer, A.C., and Slonim, D.K. (2011). Connectedness of PPI  
1022 network neighborhoods identifies regulatory hub proteins. *Bioinformatics* 27, 1135–1142.  
1023 <https://doi.org/10.1093/bioinformatics/btr099>.
- 1024 Freeman, G.J., Long, A.J., Iwai, Y., Bourque, K., Chernova, T., Nishimura, H., Fitz, L.J.,  
1025 Malenkovich, N., Okazaki, T., Byrne, M.C., et al. (2000). Engagement of the PD-1  
1026 immunoinhibitory receptor by a novel B7 family member leads to negative regulation of  
1027 lymphocyte activation. *J. Exp. Med.* 192, 1027–1034. <https://doi.org/10.1084/jem.192.7.1027>.
- 1028 Garcia-Diaz, A., Shin, D.S., Moreno, B.H., Saco, J., Escuin-Ordinas, H., Rodriguez, G.A.,  
1029 Zaretsky, J.M., Sun, L., Hugo, W., Wang, X., et al. (2017). Interferon Receptor Signaling  
1030 Pathways Regulating PD-L1 and PD-L2 Expression. *Cell Rep.* 19, 1189–1201.  
1031 <https://doi.org/10.1016/j.celrep.2017.04.031>.
- 1032 Garrett, N.F.M. dos S., Costa, A.C.C. da, Ferreira, E.B., Damiani, G., Reis, P.E.D. dos, and  
1033 Vasques, C.I. (2021). Prevalence of dermatological toxicities in patients with melanoma  
1034 undergoing immunotherapy: Systematic review and meta-analysis. *PLOS ONE* 16, e0255716.  
1035 <https://doi.org/10.1371/journal.pone.0255716>.
- 1036 Gong, J., Chehraz-Raffle, A., Reddi, S., and Salgia, R. (2018). Development of PD-1 and PD-  
1037 L1 inhibitors as a form of cancer immunotherapy: a comprehensive review of registration trials  
1038 and future considerations. *J. Immunother. Cancer* 6, 8. [https://doi.org/10.1186/s40425-018-](https://doi.org/10.1186/s40425-018-0316-z)  
1039 [0316-z](https://doi.org/10.1186/s40425-018-0316-z).
- 1040 Goodell, M.A., and Rando, T.A. (2015). Stem cells and healthy aging. *Science* 350, 1199–  
1041 1204. <https://doi.org/10.1126/science.aab3388>.
- 1042 Gray, J.V., Petsko, G.A., Johnston, G.C., Ringe, D., Singer, R.A., and Werner-Washburne, M.  
1043 (2004). “Sleeping Beauty”: Quiescence in *Saccharomyces cerevisiae*. *Microbiol. Mol. Biol.*  
1044 *Rev.* 68, 187–206. <https://doi.org/10.1128/MMBR.68.2.187-206.2004>.
- 1045 Guida, M., Strippoli, S., Maule, M., Quaglino, P., Ramondetta, A., Chiaron Sileni, V., Antonini  
1046 Cappellini, G., Queirolo, P., Ridolfi, L., Del Vecchio, M., et al. (2021). Immune checkpoint  
1047 inhibitor associated vitiligo and its impact on survival in patients with metastatic melanoma: an  
1048 Italian Melanoma Intergroup study. *ESMO Open* 6, 100064.  
1049 <https://doi.org/10.1016/j.esmoop.2021.100064>.
- 1050 Harris, M.L., Fufa, T.D., Palmer, J.W., Joshi, S.S., Larson, D.M., Incao, A., Gildea, D.E.,  
1051 Trivedi, N.S., Lee, A.N., Day, C.-P., et al. (2018). A direct link between MITF, innate immunity,  
1052 and hair graying. *PLOS Biol.* 16, e2003648. <https://doi.org/10.1371/journal.pbio.2003648>.
- 1053 Hawkshaw, N.J., Hardman, J.A., Haslam, I.S., Shahmalak, A., Gilhar, A., Lim, X., and Paus, R.  
1054 (2018). Identifying novel strategies for treating human hair loss disorders: Cyclosporine A

- 1055 suppresses the Wnt inhibitor, SFRP1, in the dermal papilla of human scalp hair follicles. *PLOS*  
1056 *Biol.* **16**, e2003705. <https://doi.org/10.1371/journal.pbio.2003705>.
- 1057 Hirano, T., Honda, T., Kanameishi, S., Honda, Y., Egawa, G., Kitoh, A., Nakajima, S., Otsuka,  
1058 A., Nomura, T., Dainichi, T., et al. (2021). PD-L1 on mast cells suppresses effector CD8+ T-  
1059 cell activation in the skin in murine contact hypersensitivity. *J. Allergy Clin. Immunol.* **148**, 563-  
1060 573.e7. <https://doi.org/10.1016/j.jaci.2020.12.654>.
- 1061 Horsley, V., Aliprantis, A.O., Polak, L., Glimcher, L.H., and Fuchs, E. (2008). NFATc1  
1062 Balances Quiescence and Proliferation of Skin Stem Cells. *Cell* **132**, 299–310.  
1063 <https://doi.org/10.1016/j.cell.2007.11.047>.
- 1064 Hsu, J.-M., Li, C.-W., Lai, Y.-J., and Hung, M.-C. (2018). Posttranslational Modifications of PD-  
1065 L1 and Their Applications in Cancer Therapy. *Cancer Res.* **78**, 6349–6353.  
1066 <https://doi.org/10.1158/0008-5472.CAN-18-1892>.
- 1067 Iakova, P., Awad, S.S., and Timchenko, N.A. (2003). Aging Reduces Proliferative Capacities of  
1068 Liver by Switching Pathways of C/EBP $\alpha$  Growth Arrest. *Cell* **113**, 495–506.  
1069 [https://doi.org/10.1016/S0092-8674\(03\)00318-0](https://doi.org/10.1016/S0092-8674(03)00318-0).
- 1070 Infarinato, N.R., Stewart, K.S., Yang, Y., Gomez, N.C., Pasolli, H.A., Hidalgo, L., Polak, L.,  
1071 Carroll, T.S., and Fuchs, E. (2020). BMP signaling: at the gate between activated melanocyte  
1072 stem cells and differentiation. *Genes Dev.* **34**, 1713–1734.  
1073 <https://doi.org/10.1101/gad.340281.120>.
- 1074 Inomata, K., Aoto, T., Binh, N.T., Okamoto, N., Tanimura, S., Wakayama, T., Iseki, S., Hara,  
1075 E., Masunaga, T., Shimizu, H., et al. (2009). Genotoxic Stress Abrogates Renewal of  
1076 Melanocyte Stem Cells by Triggering Their Differentiation. *Cell* **137**, 1088–1099.  
1077 <https://doi.org/10.1016/j.cell.2009.03.037>.
- 1078 Iwai, Y., Ishida, M., Tanaka, Y., Okazaki, T., Honjo, T., and Minato, N. (2002). Involvement of  
1079 PD-L1 on tumor cells in the escape from host immune system and tumor immunotherapy by  
1080 PD-L1 blockade. *Proc. Natl. Acad. Sci.* **99**, 12293–12297.  
1081 <https://doi.org/10.1073/pnas.192461099>.
- 1082 Janzen, V., Forkert, R., Fleming, H.E., Saito, Y., Waring, M.T., Dombkowski, D.M., Cheng, T.,  
1083 DePinho, R.A., Sharpless, N.E., and Scadden, D.T. (2006). Stem-cell ageing modified by the  
1084 cyclin-dependent kinase inhibitor p16INK4a. *Nature* **443**, 421–426.  
1085 <https://doi.org/10.1038/nature05159>.
- 1086 Johnson, S.C. (2018). Nutrient Sensing, Signaling and Ageing: The Role of IGF-1 and mTOR  
1087 in Ageing and Age-Related Disease. *Subcell. Biochem.* **90**, 49–97. [https://doi.org/10.1007/978-981-13-2835-0\\_3](https://doi.org/10.1007/978-981-13-2835-0_3).
- 1089 Joshi, S.S., Tandukar, B., Pan, L., Huang, J.M., Livak, F., Smith, B.J., Hodges, T., Mahurkar,  
1090 A.A., and Hornyak, T.J. (2019). CD34 defines melanocyte stem cell subpopulations with  
1091 distinct regenerative properties. *PLoS Genet.* **15**, e1008034.  
1092 <https://doi.org/10.1371/journal.pgen.1008034>.
- 1093 Kalamakis, G., Brüne, D., Ravichandran, S., Bolz, J., Fan, W., Ziebell, F., Stiehl, T., Catalá-  
1094 Martinez, F., Kupke, J., Zhao, S., et al. (2019). Quiescence Modulates Stem Cell Maintenance



- 1095 and Regenerative Capacity in the Aging Brain. *Cell* 176, 1407–1419.e14.  
1096 <https://doi.org/10.1016/j.cell.2019.01.040>.
- 1097 Katsimpardi, L., Litterman, N.K., Schein, P.A., Miller, C.M., Loffredo, F.S., Wojtkiewicz, G.R.,  
1098 Chen, J.W., Lee, R.T., Wagers, A.J., and Rubin, L.L. (2014). Vascular and Neurogenic  
1099 Rejuvenation of the Aging Mouse Brain by Young Systemic Factors. *Science* 344, 630–634.  
1100 <https://doi.org/10.1126/science.1251141>.
- 1101 Keir, M.E., Butte, M.J., Freeman, G.J., and Sharpe, A.H. (2008). PD-1 and Its Ligands in  
1102 Tolerance and Immunity. *Annu. Rev. Immunol.* 26, 677–704.  
1103 <https://doi.org/10.1146/annurev.immunol.26.021607.090331>.
- 1104 Keyes, B.E., Segal, J.P., Heller, E., Lien, W.-H., Chang, C.-Y., Guo, X., Oristian, D.S., Zheng,  
1105 D., and Fuchs, E. (2013). Nfatc1 orchestrates aging in hair follicle stem cells. *Proc. Natl. Acad. Sci.* 110, E4950–E4959. <https://doi.org/10.1073/pnas.1320301110>.
- 1107 Krishnamurthy, J., Ramsey, M.R., Ligon, K.L., Torrice, C., Koh, A., Bonner-Weir, S., and  
1108 Sharpless, N.E. (2006). p16 INK4a induces an age-dependent decline in islet regenerative  
1109 potential. *Nature* 443, 453–457. <https://doi.org/10.1038/nature05092>.
- 1110 Kuleshov, M.V., Jones, M.R., Rouillard, A.D., Fernandez, N.F., Duan, Q., Wang, Z., Koplev, S.,  
1111 Jenkins, S.L., Jagodnik, K.M., Lachmann, A., et al. (2016). Enrichr: a comprehensive gene set  
1112 enrichment analysis web server 2016 update. *Nucleic Acids Res.* 44, W90–97.  
1113 <https://doi.org/10.1093/nar/gkw377>.
- 1114 Kwon, J.S., Everetts, N.J., Wang, X., Wang, W., Della Croce, K., Xing, J., and Yao, G. (2017).  
1115 Controlling Depth of Cellular Quiescence by an Rb-E2F Network Switch. *Cell Rep.* 20, 3223–  
1116 3235. <https://doi.org/10.1016/j.celrep.2017.09.007>.
- 1117 Leeman, D.S., Hebestreit, K., Ruetz, T., Webb, A.E., McKay, A., Pollina, E.A., Dulken, B.W.,  
1118 Zhao, X., Yeo, R.W., Ho, T.T., et al. (2018). Lysosome activation clears aggregates and  
1119 enhances quiescent neural stem cell activation during aging. *Science* 359, 1277–1283.  
1120 <https://doi.org/10.1126/science.aag3048>.
- 1121 Li, C.-W., Lim, S.-O., Xia, W., Lee, H.-H., Chan, L.-C., Kuo, C.-W., Khoo, K.-H., Chang, S.-S.,  
1122 Cha, J.-H., Kim, T., et al. (2016). Glycosylation and stabilization of programmed death ligand-1  
1123 suppresses T-cell activity. *Nat. Commun.* 7, 1–11. <https://doi.org/10.1038/ncomms12632>.
- 1124 Liu, L., Cheung, T.H., Charville, G.W., Hurgo, B.M.C., Leavitt, T., Shih, J., Brunet, A., and  
1125 Rando, T.A. (2013). Chromatin Modifications as Determinants of Muscle Stem Cell  
1126 Quiescence and Chronological Aging. *Cell Rep.* 4, 189–204.  
1127 <https://doi.org/10.1016/j.celrep.2013.05.043>.
- 1128 Liu, Y., Gu, H.-Y., Zhu, J., Niu, Y.-M., Zhang, C., and Guo, G.-L. (2019). Identification of Hub  
1129 Genes and Key Pathways Associated With Bipolar Disorder Based on Weighted Gene Co-  
1130 expression Network Analysis. *Front. Physiol.* 10. <https://doi.org/10.3389/fphys.2019.01081>.
- 1131 Lovén, J., Orlando, D.A., Sigova, A.A., Lin, C.Y., Rahl, P.B., Burge, C.B., Levens, D.L., Lee,  
1132 T.I., and Young, R.A. (2012). Revisiting Global Gene Expression Analysis. *Cell* 151, 476–482.  
1133 <https://doi.org/10.1016/j.cell.2012.10.012>.

- 1134 Mak, S.-S., Moriyama, M., Nishioka, E., Osawa, M., and Nishikawa, S.-I. (2006). Indispensable  
1135 role of Bcl2 in the development of the melanocyte stem cell. *Dev. Biol.* 291, 144–153.  
1136 <https://doi.org/10.1016/j.ydbio.2005.12.025>.
- 1137 Manson, G., Marabelle, A., and Houot, R. (2018). Hair Repigmentation With Anti-PD-1 and  
1138 Anti-PD-L1 Immunotherapy: A Novel Hypothesis. *JAMA Dermatol.* 154, 113.  
1139 <https://doi.org/10.1001/jamadermatol.2017.4421>.
- 1140 Meng, Y., Liang, H., Hu, J., Liu, S., Hao, X., Wong, M.S.K., Li, X., and Hu, L. (2018). PD-L1  
1141 Expression Correlates With Tumor Infiltrating Lymphocytes And Response To Neoadjuvant  
1142 Chemotherapy In Cervical Cancer. *J. Cancer* 9, 2938–2945. <https://doi.org/10.7150/jca.22532>.
- 1143 Mourikis, P., Sambasivan, R., Castel, D., Rocheteau, P., Bizzarro, V., and Tajbakhsh, S.  
1144 (2012). A critical requirement for notch signaling in maintenance of the quiescent skeletal  
1145 muscle stem cell state. *Stem Cells Dayt. Ohio* 30, 243–252. <https://doi.org/10.1002/stem.775>.
- 1146 Müller-Röver, S., Foitzik, K., Paus, R., Handjiski, B., van der Veen, C., Eichmüller, S., McKay,  
1147 I.A., and Stenn, K.S. (2001). A Comprehensive Guide for the Accurate Classification of Murine  
1148 Hair Follicles in Distinct Hair Cycle Stages. *J. Invest. Dermatol.* 117, 3–15.  
1149 <https://doi.org/10.1046/j.0022-202x.2001.01377.x>.
- 1150 Nishimura, E.K., Jordan, S.A., Oshima, H., Yoshida, H., Osawa, M., Moriyama, M., Jackson,  
1151 I.J., Barrandon, Y., Miyachi, Y., and Nishikawa, S.-I. (2002). Dominant role of the niche in  
1152 melanocyte stem-cell fate determination. *Nature* 416, 854–860.  
1153 <https://doi.org/10.1038/416854a>.
- 1154 Nishimura, E.K., Granter, S.R., and Fisher, D.E. (2005). Mechanisms of Hair Graying:  
1155 Incomplete Melanocyte Stem Cell Maintenance in the Niche. *Science* 307, 720–724.  
1156 <https://doi.org/10.1126/science.1099593>.
- 1157 Nishimura, E.K., Suzuki, M., Igras, V., Du, J., Lonning, S., Miyachi, Y., Roes, J., Beermann, F.,  
1158 and Fisher, D.E. (2010). Key Roles for Transforming Growth Factor  $\beta$  in Melanocyte Stem Cell  
1159 Maintenance. *Cell Stem Cell* 6, 130–140. <https://doi.org/10.1016/j.stem.2009.12.010>.
- 1160 Oh, J., Lee, Y.D., and Wagers, A.J. (2014). Stem cell aging: mechanisms, regulators and  
1161 therapeutic opportunities. *Nat. Med.* 20, 870–880. <https://doi.org/10.1038/nm.3651>.
- 1162 Paus, R., Ito, N., Takigawa, M., and Ito, T. (2003). The Hair Follicle and Immune Privilege. *J.*  
1163 *Investig. Dermatol. Symp. Proc.* 8, 188–194. [https://doi.org/10.1046/j.1087-](https://doi.org/10.1046/j.1087-0024.2003.00807.x)  
1164 [0024.2003.00807.x](https://doi.org/10.1046/j.1087-0024.2003.00807.x).
- 1165 Peters, E.M.J., Maurer, M., Botchkarev, V.A., Jensen, K. deMasey, Welker, P., Scott, G.A.,  
1166 and Paus, R. (2003). Kit Is Expressed by Epithelial Cells In Vivo. *J. Invest. Dermatol.* 121,  
1167 976–984. <https://doi.org/10.1046/j.1523-1747.2003.12478.x>.
- 1168 Qin, W., Hu, L., Zhang, X., Jiang, S., Li, J., Zhang, Z., and Wang, X. (2019). The Diverse  
1169 Function of PD-1/PD-L Pathway Beyond Cancer. *Front. Immunol.* 10. .
- 1170 Rabbani, P., Takeo, M., Chou, W., Myung, P., Bosenberg, M., Chin, L., Taketo, M.M., and Ito,  
1171 M. (2011). Coordinated Activation of Wnt in Epithelial and Melanocyte Stem Cells Initiates  
1172 Pigmented Hair Regeneration. *Cell* 145, 941–955. <https://doi.org/10.1016/j.cell.2011.05.004>.

1173 Raedler, L.A. (2015). Keytruda (Pembrolizumab): First PD-1 Inhibitor Approved for Previously  
1174 Treated Unresectable or Metastatic Melanoma. *Am. Health Drug Benefits* 8, 96–100. .

1175 Rivera, N., Boada, A., Bielsa, M.I., Fernández-Figueras, M.T., Carcereny, E., Moran, M.T., and  
1176 Ferrándiz, C. (2017). Hair Repigmentation During Immunotherapy Treatment With an Anti–  
1177 Programmed Cell Death 1 and Anti–Programmed Cell Death Ligand 1 Agent for Lung Cancer.  
1178 *JAMA Dermatol.* 153, 1162–1165. <https://doi.org/10.1001/jamadermatol.2017.2106>.

1179 Rodgers, J.T., King, K.Y., Brett, J.O., Cromie, M.J., Charville, G.W., Maguire, K.K., Brunson,  
1180 C., Mastey, N., Liu, L., Tsai, C.-R., et al. (2014). mTORC1 controls the adaptive transition of  
1181 quiescent stem cells from G0 to GAlert. *Nature* 510, 393–396.  
1182 <https://doi.org/10.1038/nature13255>.

1183 Rumman, M., Dhawan, J., and Kassem, M. (2015). Concise Review: Quiescence in Adult  
1184 Stem Cells: Biological Significance and Relevance to Tissue Regeneration: ASC Quiescence:  
1185 Role and Relevance to Tissue Regeneration. *STEM CELLS* 33, 2903–2912.  
1186 <https://doi.org/10.1002/stem.2056>.

1187 Salic, A., and Mitchison, T.J. (2008). A chemical method for fast and sensitive detection of  
1188 DNA synthesis in vivo. *Proc. Natl. Acad. Sci.* 105, 2415–2420.  
1189 <https://doi.org/10.1073/pnas.0712168105>.

1190 Sharifi, S., da Costa, H.F.R., and Bierhoff, H. (2020). The circuitry between ribosome  
1191 biogenesis and translation in stem cell function and ageing. *Mech. Ageing Dev.* 189, 111282.  
1192 <https://doi.org/10.1016/j.mad.2020.111282>.

1193 Slominski, A., Paus, R., Plonka, P., Chakraborty, A., Maurer, M., Pruski, D., and Lukiewicz, S.  
1194 (1994). Melanogenesis During the Anagen-Catagen-Telogen Transformation of the Murine  
1195 Hair Cycle. *J. Invest. Dermatol.* 102, 862–869. <https://doi.org/10.1111/1523-1747.ep12382606>.

1196 Slominski, A., Wortsman, J., Plonka, P.M., Schallreuter, K.U., Paus, R., and Tobin, D.J.  
1197 (2005). Hair Follicle Pigmentation. *J. Invest. Dermatol.* 124, 13–21.  
1198 <https://doi.org/10.1111/j.0022-202X.2004.23528.x>.

1199 Sviderskaya, E.V., Wakeling, W.F., and Bennett, D.C. (1995). A cloned, immortal line of  
1200 murine melanoblasts inducible to differentiate to melanocytes. *Development* 121, 1547–1557. .

1201 Szklarczyk, D., Gable, A.L., Lyon, D., Junge, A., Wyder, S., Huerta-Cepas, J., Simonovic, M.,  
1202 Doncheva, N.T., Morris, J.H., Bork, P., et al. (2019). STRING v11: protein–protein association  
1203 networks with increased coverage, supporting functional discovery in genome-wide  
1204 experimental datasets. *Nucleic Acids Res.* 47, D607–D613.  
1205 <https://doi.org/10.1093/nar/gky1131>.

1206 Tanimura, S., Tadokoro, Y., Inomata, K., Binh, N.T., Nishie, W., Yamazaki, S., Nakauchi, H.,  
1207 Tanaka, Y., McMillan, J.R., Sawamura, D., et al. (2011). Hair Follicle Stem Cells Provide a  
1208 Functional Niche for Melanocyte Stem Cells. *Cell Stem Cell* 8, 177–187.  
1209 <https://doi.org/10.1016/j.stem.2010.11.029>.

1210 Tümpel, S., and Rudolph, K.L. (2019). Quiescence: Good and Bad of Stem Cell Aging. *Trends*  
1211 *Cell Biol.* 29, 672–685. <https://doi.org/10.1016/j.tcb.2019.05.002>.

- 1212 Ueno, M., Aoto, T., Mohri, Y., Yokozeki, H., and Nishimura, E.K. (2014). Coupling of the  
1213 radiosensitivity of melanocyte stem cells to their dormancy during the hair cycle. *Pigment Cell*  
1214 *Melanoma Res.* 27, 540–551. <https://doi.org/10.1111/pcmr.12251>.
- 1215 Uno, M., and Nishida, E. (2016). Lifespan-regulating genes in *C. elegans*. *Npj Aging Mech.*  
1216 *Dis.* 2, 1–8. <https://doi.org/10.1038/npjamd.2016.10>.
- 1217 Urbán, N., and Cheung, T.H. (2021). Stem cell quiescence: the challenging path to activation.  
1218 *Dev. Camb. Engl.* 148, dev165084. <https://doi.org/10.1242/dev.165084>.
- 1219 van Veelen, W., Korsse, S.E., van de Laar, L., and Peppelenbosch, M.P. (2011). The long and  
1220 winding road to rational treatment of cancer associated with LKB1/AMPK/TSC/mTORC1  
1221 signaling. *Oncogene* 30, 2289–2303. <https://doi.org/10.1038/onc.2010.630>.
- 1222 Velthoven, C.T.J. van, and Rando, T.A. (2019). Stem Cell Quiescence: Dynamism, Restraint,  
1223 and Cellular Idling. *Cell Stem Cell* 24, 213–225. <https://doi.org/10.1016/j.stem.2019.01.001>.
- 1224 Yale, K., Juhasz, M., and Atanaskova Mesinkovska, N. (2020). Medication-Induced  
1225 Repigmentation of Gray Hair: A Systematic Review. *Skin Appendage Disord.* 6, 1–10.  
1226 <https://doi.org/10.1159/000504414>.
- 1227 Yao, Y., Tao, R., Wang, X., Wang, Y., Mao, Y., and Zhou, L.F. (2009). B7-H1 is correlated with  
1228 malignancy-grade gliomas but is not expressed exclusively on tumor stem-like cells. *Neuro-*  
1229 *Oncol.* 11, 757–766. <https://doi.org/10.1215/15228517-2009-014>.
- 1230 Yi, M., Niu, M., Xu, L., Luo, S., and Wu, K. (2021). Regulation of PD-L1 expression in the  
1231 tumor microenvironment. *J. Hematol. Oncol.* J Hematol Oncol 14, 10.  
1232 <https://doi.org/10.1186/s13045-020-01027-5>.
- 1233 Zhang, J., Bu, X., Wang, H., Zhu, Y., Geng, Y., Nihira, N.T., Tan, Y., Ci, Y., Wu, F., Dai, X., et  
1234 al. (2018). Cyclin D–CDK4 kinase destabilizes PD-L1 via cullin 3–SPOP to control cancer  
1235 immune surveillance. *Nature* 553, 91–95. <https://doi.org/10.1038/nature25015>.
- 1236 Zhang, L., Gajewski, T.F., and Kline, J. (2009). PD-1/PD-L1 interactions inhibit antitumor  
1237 immune responses in a murine acute myeloid leukemia model. *Blood* 114, 1545–1552.  
1238 <https://doi.org/10.1182/blood-2009-03-206672>.
- 1239 Zhang, N., Zeng, Y., Du, W., Zhu, J., Shen, D., Liu, Z., and Huang, J.-A. (2016). The EGFR  
1240 pathway is involved in the regulation of PD-L1 expression via the IL-6/JAK/STAT3 signaling  
1241 pathway in EGFR-mutated non-small cell lung cancer. *Int. J. Oncol.* 49, 1360–1368.  
1242 <https://doi.org/10.3892/ijo.2016.3632>.
- 1243 Zhou, L., Wen, L., Sheng, Y., Lu, J., Hu, R., Wang, X., Lu, Z., and Yang, Q. (2021). The PD-  
1244 1/PD-L1 pathway in murine hair cycle transition: a potential anagen phase regulator. *Arch.*  
1245 *Dermatol. Res.* 313, 751–758. <https://doi.org/10.1007/s00403-020-02169-9>.
- 1246 Zhou, Y., Yan, X., Feng, X., Bu, J., Dong, Y., Lin, P., Hayashi, Y., Huang, R., Olsson, A.,  
1247 Andreassen, P.R., et al. (2018). Setd2 regulates quiescence and differentiation of adult  
1248 hematopoietic stem cells by restricting RNA polymerase II elongation. *Haematologica* 103,  
1249 1110–1123. <https://doi.org/10.3324/haematol.2018.187708>.

1250



Figure 1

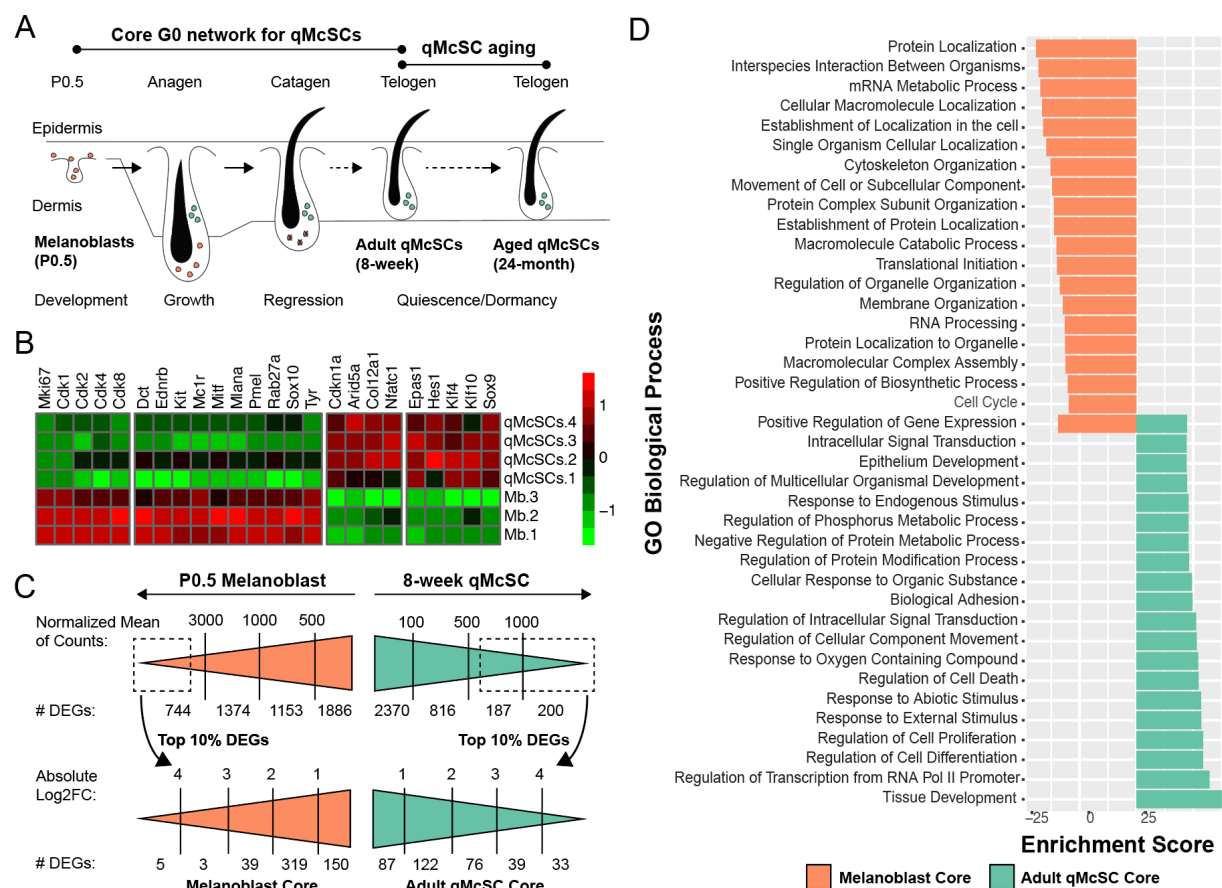

(A) Diagram depicting the three main stages of the hair cycle (anagen, catagen, and telogen) and the timepoints used for RNA-seq comparisons of melanocytic cells (P0.5 melanoblasts, 8-week adult qMcSCs, and 24-month aged qMcSCs). (B) Heatmap showing differential expression of the cell cycle, lineage, stemness, and G0-associated genes between P0.5 melanoblasts and 8-week adult qMcSCs. (C) The distribution of mean normalized counts of statistically significant DEGs ( $q$ -value  $< 0.05$ ,  $L2FC > 0.5$ ) identified between P0.5 melanoblasts and 8-week adult qMcSCs. The top 10% of highly expressed DEGs were included as part of the melanoblast and adult qMcSC core gene sets. (D) Clustered bar graph of the top 20 enriched biological processes associated with the two sets of core DEGs.

Figure 2

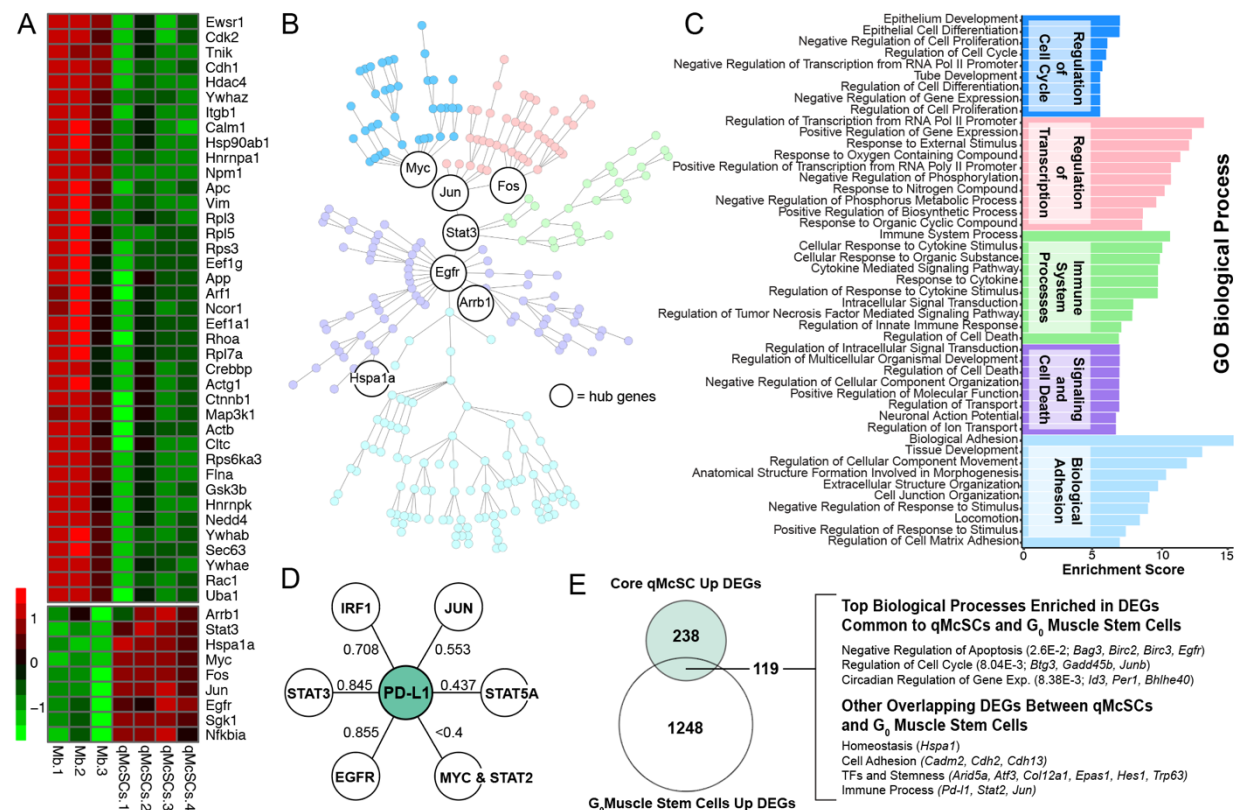

A) Heatmap of hub genes differentially expressed by P0.5 melanoblasts and 8-week adult qMcSCs. (B) Protein-protein interaction network of the upregulated qMcSC core DEGs revealing five major branches enriched for specific biological processes. (C) Clustered bar graph of the top 10 enriched biological processes for each of the five branches identified in B. (D) Combined interaction scores between PD-L1 and upregulated qMcSC core DEGs that are known *Pd-l1* gene promoter binding partners or upstream of *Pd-l1* expression. Interaction scores were based on text-mining, experimental, and database evidence obtained from STRING database (v11.0). (E) Overlap of adult qMcSCs core DEGs and genes with elevated expression in G<sub>0</sub> muscle stem cells showing a high degree of overlap (119/357). Select biological processes associated with these common genes are indicated.

Figure 3

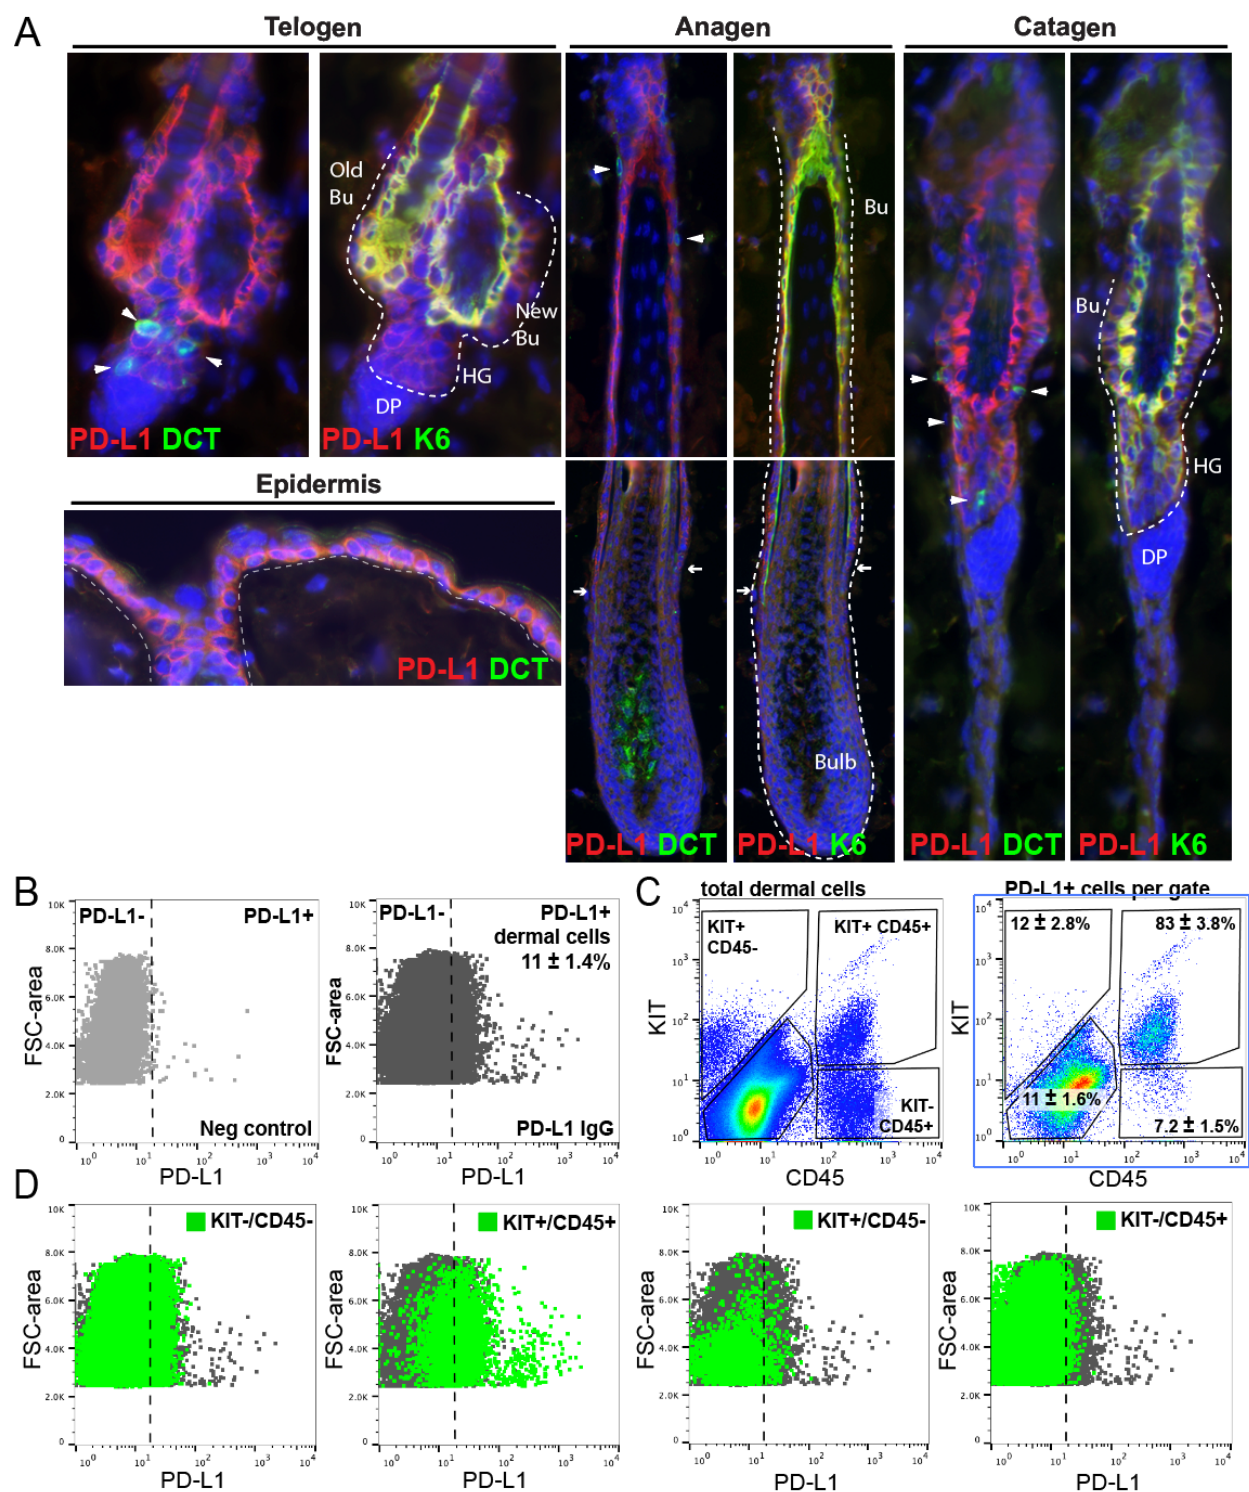

(A) Representative images of PD-L1 staining (red) of the hair follicle and McSCs (DCT, green) during the and telogen (dormant), anagen (active), and catagen (regression) stages of the hair cycle and epidermis in 2-4-month old males and females. The K6+ (green) inner layer of hair follicle cells (at telogen and catagen) and the companion layer (at anagen) is indicated matched images. Tissues were counterstained with DAPI (blue). Arrowheads mark McSCs. Arrows in the anagen images indicate the extent of PD-L1 staining. Dotted lines highlight the shape of the hair follicles. Bu, bulge; HG, hair germ. (B) Gating strategy for flow cytometric assessment of PD-L1<sup>mem+</sup> cells within the dermis of telogen skin. (C) Gating strategy for the quantification of qMcSCs (KIT+/CD45-), mast cells (KIT+/CD45+), and other immune cells (KIT-/CD45+) along with percent PD-L1<sup>mem+</sup> staining of these subpopulations (n=4). (D) PD-L1 expression intensity and cell size (FSC-area) across the various KIT/CD45 populations of the dermis.



Figure 4

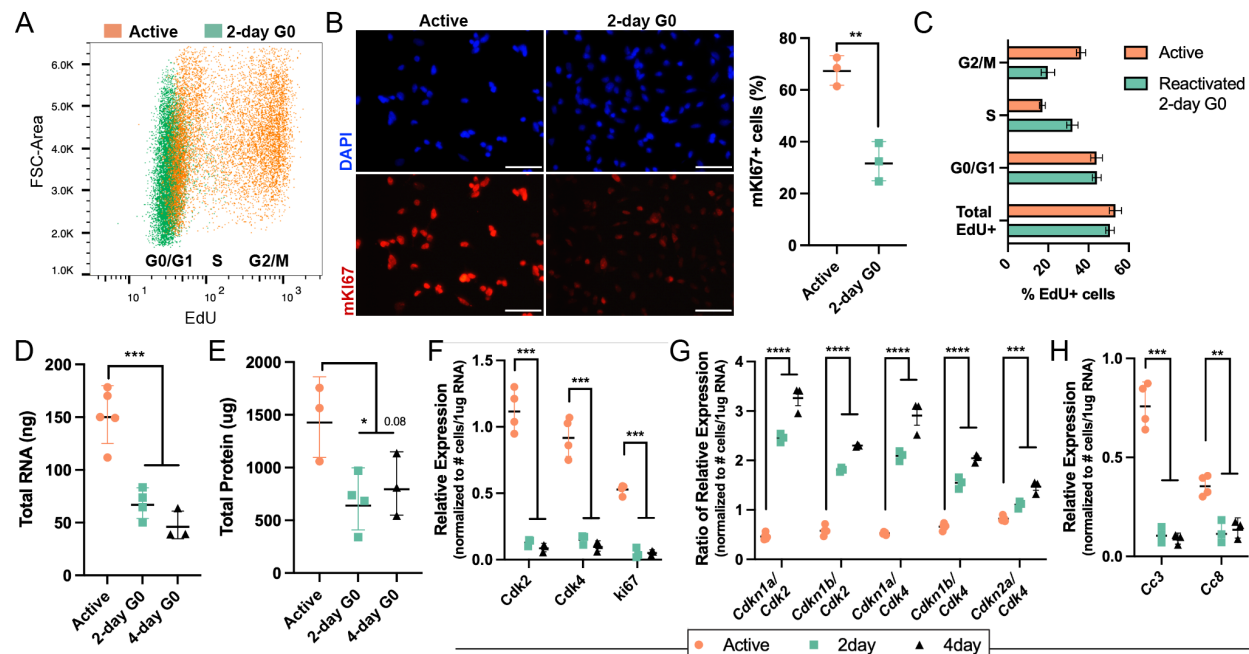

(A) EdU labeling of actively proliferating and 2-day G<sub>0</sub> melb-a cells demonstrating that 2-day G<sub>0</sub> are not actively synthesizing DNA and have exited the cell cycle. (B) Representative images of actively proliferating and 2-day G<sub>0</sub> melb-a cells stained for DAPI (blue) and mKi67 (red), and associated quantification of % mKi67+ cells assessed by flow cytometry. (C) Incorporation of EdU 18 hours post reactivation of 2-day G<sub>0</sub> melb-a cells compared to actively proliferating cells confirms the ability of 2-day G<sub>0</sub> cells to reenter all stages of the cell cycle after quiescence induction. (D-E) Quantification of total RNA and protein present in 1x10<sup>6</sup> cells actively proliferating 2-day G<sub>0</sub>, and 4-day G<sub>0</sub> melb-a cells demonstrating a reduction in overall RNA and protein levels. (F) RT-qPCR quantification showing decreased relative expression of proliferation markers (*Cdk2*, *Cdk4*, *mKi67*) in 2-day G<sub>0</sub> and 4-day G<sub>0</sub> compared to actively proliferating melb-a cells. (G) RT-qPCR quantification represented by a ratio of cyclin-dependent kinase inhibitors to respective CDKs demonstrating an increase in 2-day G<sub>0</sub> and further increased in 4-day G<sub>0</sub> compared to actively proliferating melb-a cells. (H) RT-qPCR quantification showing decreased relative expression of apoptosis markers (*Cc3* and *Cc8*) in 2-day G<sub>0</sub> and 4-day G<sub>0</sub> compared to actively proliferating melb-a cells. In column graphs, each dot represents a biological replicate and bars represent the mean ± SD. Asterisks indicate adjusted p-value (\* < 0.05, \*\* < 0.01, \*\*\* < 0.001, \*\*\*\* < 0.0001).

Figure 5

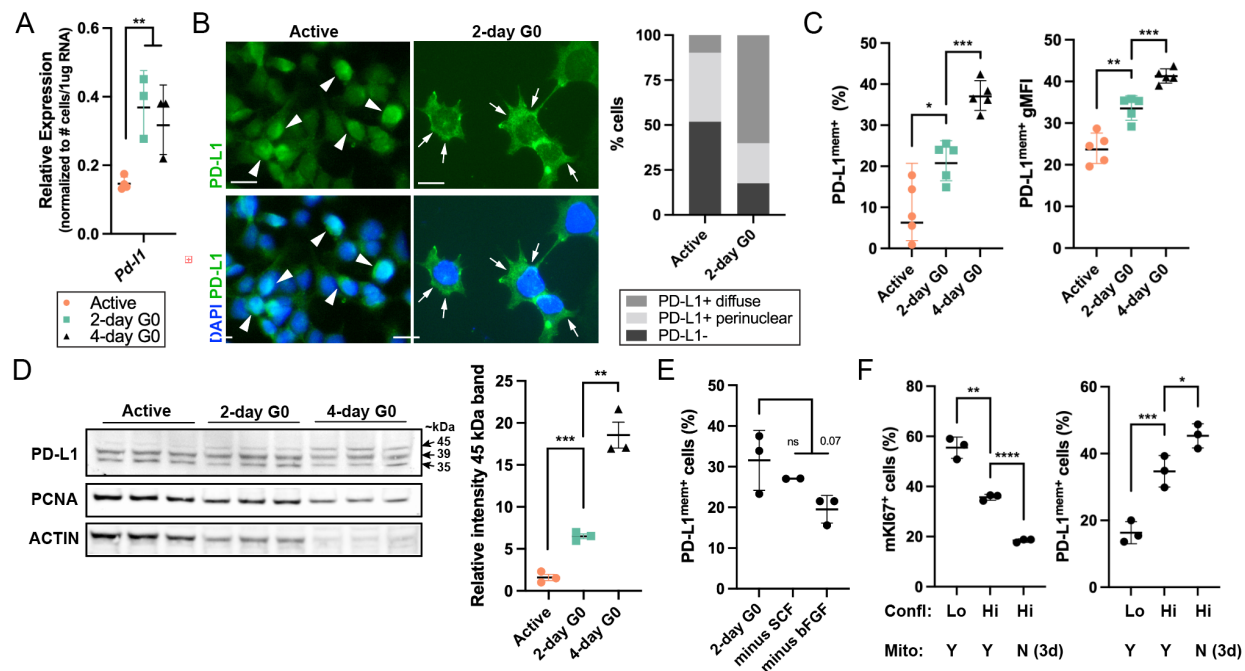

(A) RT-qPCR quantification showing increased relative expression of *Pd-l1* (Cd274 gene) following G<sub>0</sub> induction in 2- and 4-day G<sub>0</sub> melb-a cells. (B) Representative images of actively proliferating and 2-day G<sub>0</sub> melb-a cells stained for DAPI (blue) and PD-L1 (green) demonstrating two different PD-L1 expression patterns, perinuclear and diffuse. Bar graph represents the associated quantification of these staining patterns revealing that 2-day G<sub>0</sub> melb-a cells exhibit the more diffuse PD-L1 staining pattern. (C) Flow cytometric quantification of PD-L1<sup>mem+</sup> expression in non-permeabilized melb-a cells. Comparison of actively proliferating, 2-day G<sub>0</sub>, and 4-day G<sub>0</sub> melb-a cells showing an increase in the percentage of PD-L1<sup>mem+</sup> cells and PD-L1<sup>mem+</sup> geometric mean fluorescent intensity (gMFI) with length of G<sub>0</sub>. (D) Western blot of total PD-L1, PCNA and ACTIN in cell lysates harvested from 1x10<sup>6</sup> melb-a cells. Bar graph represents quantification of the relative intensity of the 45 kDa PD-L1 band. (E) Single mitogen removal during entry into G<sub>0</sub> shows that SCF, but not bFGF, is sufficient to induce a similar percentage of PD-L1<sup>mem+</sup> melb-a cells as compared to 2-day G<sub>0</sub> melb-a cells. (F) The use of high confluency as an alternative method for G<sub>0</sub> shows a similar trend in the decrease of mKi67<sup>+</sup> melb-a cells and an increase in PD-L1<sup>mem+</sup> melb-a cells but not to the same extent compared to mitogen withdrawal. In column graphs, each dot represents a biological replicate and bars represent mean ± SD. Asterisks indicate adjusted p-value (\* < 0.05, \*\* < 0.01, \*\*\* < 0.001, \*\*\*\* < 0.0001).

Figure 6

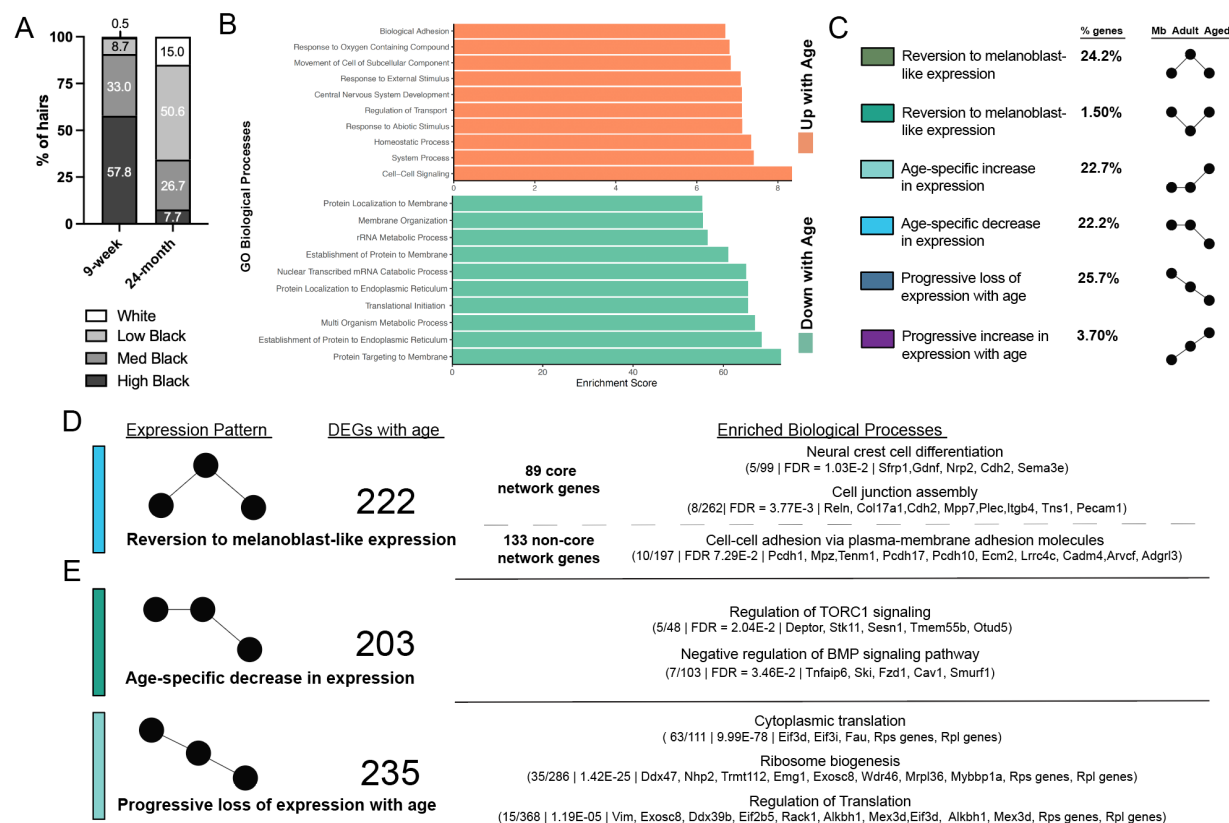

(A) Quantification of the decline in hair follicle pigmentation in 24-month-old aged (n=4) compared to 8-week-old adult female mice (n=5). (B) Clustered bar graph of the biological processes identified by gene set enrichment analysis of the DEGs associated with aged qMcSCs compared to adult qMcSCs. (C) Overview of the expression patterns of the DEGs identified in aged qMcSCs across the melanoblast (P0.5), adult (8-week), and aged (24-month) timepoints. (D-E) Breakdown of the number of DEGs and representative biological processes associated with the expression patterns indicated.

Figure 7

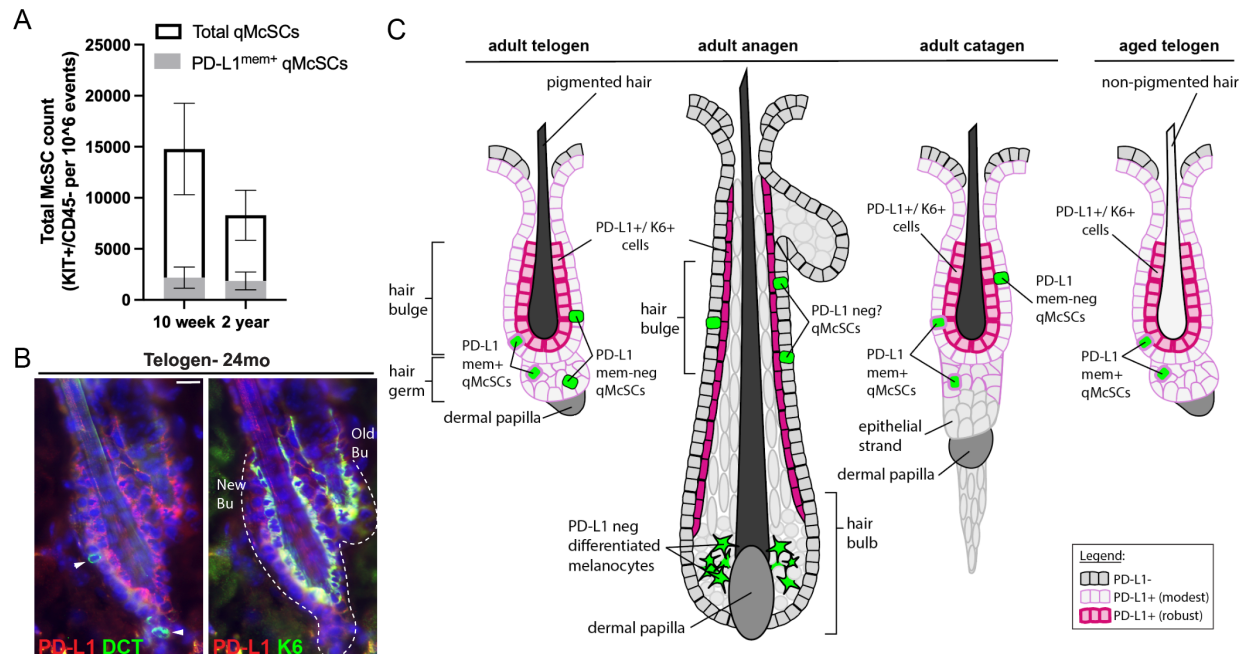

(A) Quantification of PD-L1<sup>mem+</sup> qMcSCs in adult qMcSCs (10-week) compared to aged (24-month) qMcSCs as determined by flow cytometry of dissociated dermis from female mice (n=3/timepoint). Total qMcSCs are notably reduced with aging whereas the PD-L1<sup>mem+</sup> subpopulation remains constant. (B) Representative images of PD-L1 (red) and K6 (green) staining of the hair follicle and McSCs (DCT, green) during telogen in aged (24-month) female skin. Tissues were counterstained with DAPI (blue). Arrowheads mark McSCs. Dotted lines highlight the shape of the hair follicles. Bu, bulge; HG, hair germ. (C) Diagram representing the expression of PD-L1 in the hair follicle and McSCs in the context of hair cycling and with age.
